# Supplementary material
Source: publisher figshare collection journal article supplement (https://diabetesjournals.figshare.com/articles/dataset/_/17054093)
Supplement: Supplementary file 1 [file 1]

Supplementary Figure 1 Flowchart of the participants included in final analyses of the UK Biobank.

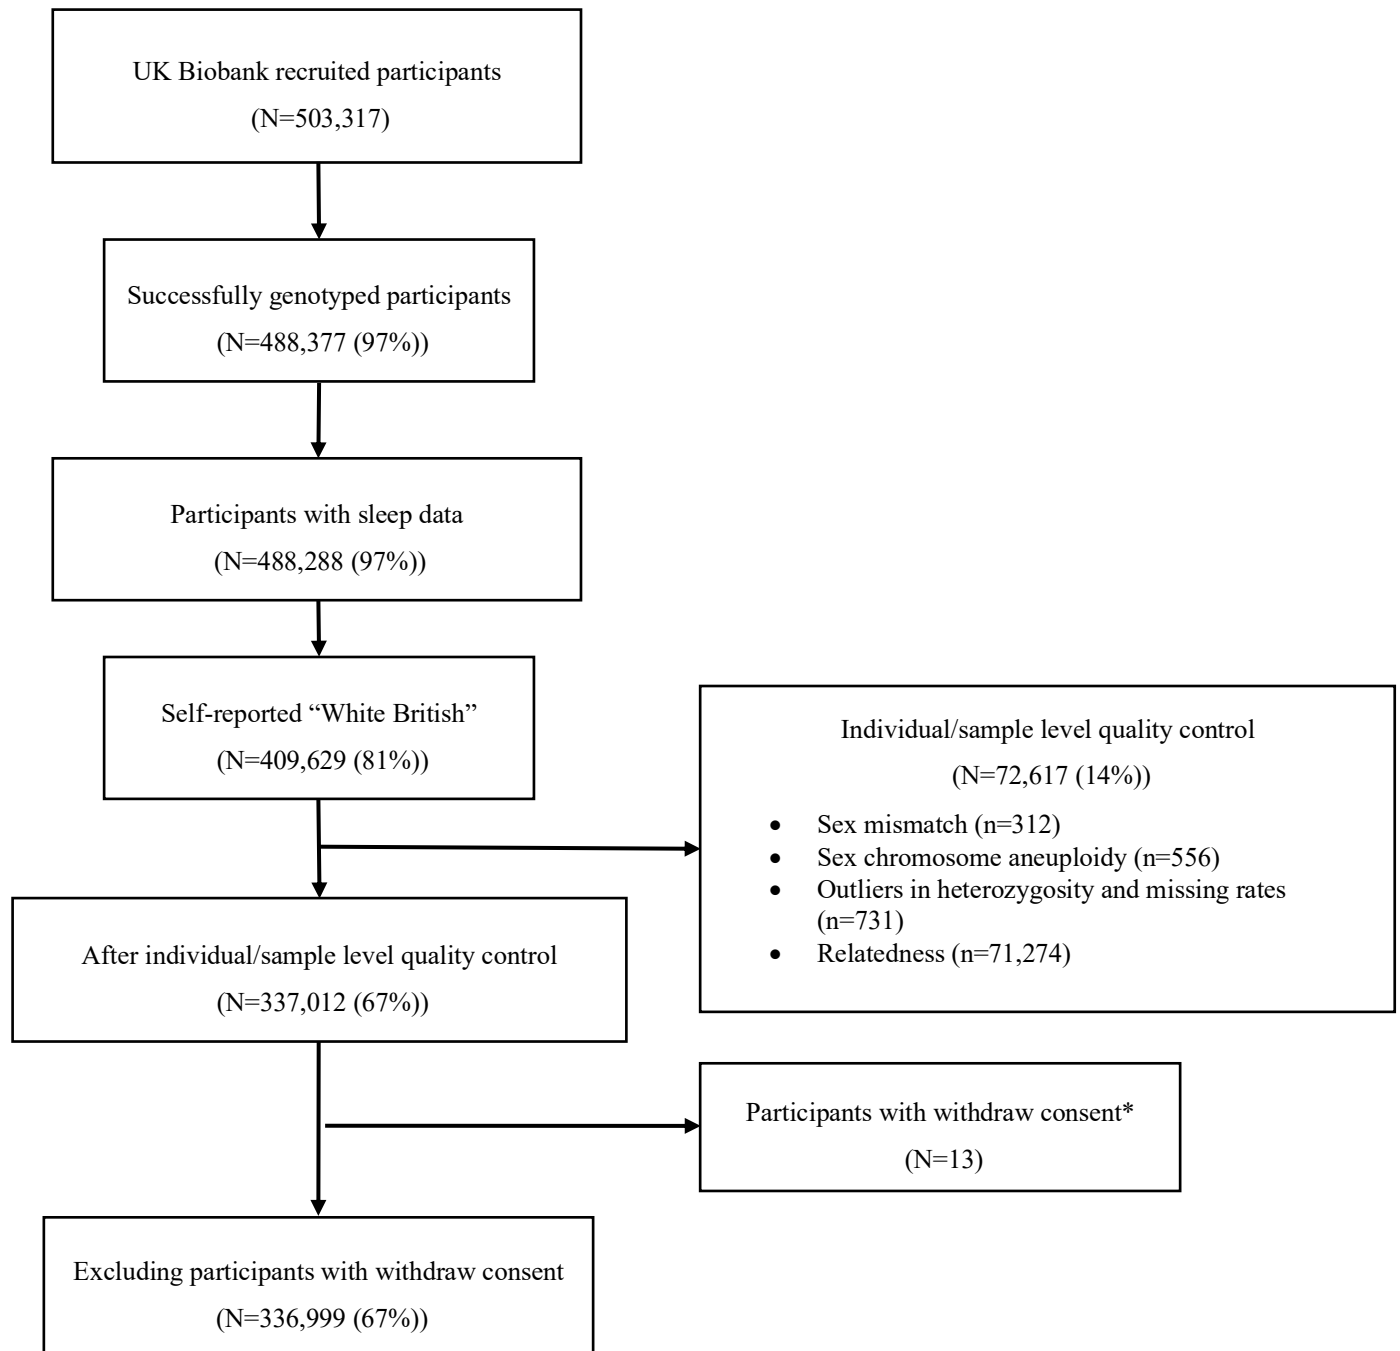

% values in brackets are of the total recruited to UK Biobank

\* Participants with withdraw consent by 04 February 2020
