# Supplementary material
Source: publisher figshare collection journal article supplement (https://diabetesjournals.figshare.com/articles/dataset/_/17054093)
Supplement: Supplementary file 1 [file 1]

## Sheet: ST1
Supplementary Table 1: Summary of genome-wide significant genetic instruments of sleep traits in the discovery genome-wide association studies and specific instrument strength applying to the UK Biobank and the MAGIC Consortium
Exposure	Instruments' information from the discovery GWAS					Instruments' information in the UKB						2SMR apply to MAGIC ( (HbA1c as an outcome)
	Discovery GWAS	N	Cohorts that discovery GWAS used	nSNPs identified	R2*	N	nSNPs to generate the allele score	Mean (SD) number of increasing alleles	Coefficient (SE)	R2*	F-statistics †	nSNP merged	R2 *	F-statistics †
Insomnia symptoms	Jansen PR et. Al 2019; PMID: 30804565	1331010	Ntotal= 1,331,010 (UKB: 109,402 cases / 277,131 controls; 23andMe: 288,557 cases / 655,920 controls )	248	0.026	336766	245	242.9(10.2)	0.003(0.0001)	0.00538708	1824	179	0.0055	41.1176
24-hour sleep duration (hr) (SD=1.1hr) (original unit = min)	Dashti HS et. Al 2019; PMID: 30846698	446118	UKB (n=446,118)	78	0.0069	335198	77	7.2(1.1)	0.015(0.0003)	0.00591653	1995	54	0.0049	40.6754
Short sleep duration (<=6hr vs 7-8hr sleep)	Dashti HS et. Al 2019; PMID: 30846698	411934	UKB (n=411,934 (106,192 cases / 305,742 controls))	27	NG	309510	27	26.3(3.2)	0.006(0.0002)	0.00214396	665	20	0.0013	26.8092
Long sleep duration (>=9hr vs 7-8hr sleep)	Dashti HS et. Al 2019; PMID: 30846698	339926	UKB (n=339,926 (34,184 cases / 305,742 controls))	8	NG	255764	7	4.1(1.4)	0.006(0.0004)	0.000707189	181	5	0.0006	40.8149
Daytime sleepiness (per category increase)	Wang H et. Al; PMID: 31409809	452071	UKB (n=452,071)	37	NG	335852	37	35.9(3.9)	0.007(0.0002)	0.00312235	1052	26	0.0025	43.5747
Daytime napping (per category increase)	Dashti HS et. al 2020, pre-printed, https://doi.org/10.1101/2020.06.12.20129858	993966	UKB (n=452,633) and 23andMe (n=541,333), Ntotal=993,966	123/108 §	0.011	320957	114	114.1 (6.8)	0.009(0.0002)	0.00985349	3194	71	0.0056	78.8331
Chronotype (per category increase from extreme evening to extreme morning) ‡	Jones SE et. Al 2019; PMID: 30696823	697828	UKB (n=449,734) and 23andMe (n=248,098, 120,478 cases, 127,622 controls), Ntotal=697, 828)	351	NG	335976	341	347.8 (11.6)	0.016(0.0002)	0.021434	7359	250	0.0209	59.5623
UKB: UK Biobank, GWAS: genome-wide association study, MAGIC: Meta-Analyses of Glucose and Insulin-related traits Consortium, SNP: single-nucleotide polymorphism, SD: standard deviation; SE: standard error, NG: not given
* Discovery GWAS R2 was obtained from the information given in the discovery GWAS; in 1SMR applying to the UK Biobank, R2 of the allele score was calculated via R2 = K*F/(N-K-1+K*F), K=1; in 2SMR applying to the MAGIC, R2 was calculated via Sum(R2i = K*Fi/(N-K-1+K*Fi), K=1, Fi = BetaXGi^2 / seBetaXGi^2, BetaXGi and seBetaXGi were obtained from the discovery GWAS
† F statistic of the unweighted allele score in the UK Biobank (1SMR) was calculated via ANOVA adjusted for sex, age, assessment centre, chip, 40 genetic principal components; F statistic in the genetic variants applying to MAGIC (2SMR) was calculated via F = (N-K-1)/K * R2/(1-R2), K=nSNP merged, N= sample size in the discovery GWAS.
‡ In the discovery GWAS of chronotype, the chronotype increasing allele is morning preference (categories were ordered from more ‘eveningness’ to more ‘morningness’), we have flipped the evening preference alleles for chronotype for better interpretation (where ‘definitely a morning person’ is the reference category).
§ 123 significant SNPs were identified in the UKB, which were applied to the one-sample Mendelian randomization; 108 significant were identified SNPs in UKB and 23andMe Meta-analysis, which were applied in the two-sample Mendelian randomization

## Sheet: ST2
Supplementary Table 2: Baseline characteristics of excluded participants in the UK Biobank
Variable		Data
n		165631
Age, years		55.8 (8.3)
Female sex, %		56
Townsend deprivation index		-0.71 (3.33)
Diabetes defined by Eastwood algorithm, %		6
HbA1c >= 48 mmol/mol		5
Diagnosed sleep apnoea, %		0.55
Body mass index, kg/m2		27.5 (4.9)
Smoking
	Current, %	12
	Former, %	33
Alcohol intake *
	Daily, %	18
	One to four times a week, %	45
	One to three times a month, %	11
	Never / occasionally, %	25
Education (ISCED codes)
	College or university degree / NVQ or HND or HNC or equivalent, %	49
	Other prof.equal. Eg: nursing, teaching, %	11
	A levels / AS levels or equivalent, %	6
	O levels / GCSEs or equivalent / CSEs or equivalent, %	16
	None of the above, %	18
Days of vigorous physical activity per week *
	0 - 1 day, %	51
	2 - 3 days, %	29
	4 - 7 days, %	20
Insomnia symptoms
	Never/rarely and Sometimes, %	72
	Usually, %	28
24-hour sleep duration, hours		7.1 (1.2)
Short sleep duration (<=6hr), %		29
Long sleep duration (>=9hr), %		11
Excessive daytime sleepiness
	Never/rarely, %	74
	Sometimes, %	23
	Often/always, %	3
	All of the time, %	0.01
Napping
	Never/rarely, %	55
	Sometimes, %	39
	Often, %	6
Chronotype
	Morning, %	25
	More 'morning' than 'evening', %	30
	Do not know, %	11
	More ''evening' ' than 'morning', %	25
	Evening, %	9
HbA1c, mmol/mol / log HbA1c †
	All ( n = 145,452)	35 (33, 38) / 3.58 (0.16)
	People with diabetes (n = 8,681)	50 (44, 60) / 3.96 (0.25)
	People without diabetes (n = 136,764)	35 (33, 38) / 3.56 (0.12)
Glucose, mmol/L / log glucose †
	All ( n = 135,752)	4.9 (4.6, 5.3) / 1.62 (0.18)
	People with diabetes (n = 8,229)	6.4 (5.2, 8.8) / 1.94 (0.40)
	People without diabetes (n = 127,515)	4.9 (4.6, 5.2) / 1.60 (0.14)
* For alcohol intake, it was categorized and adjusted as the following categories: “Daily”, “One or four times a week”, “Once or twice a week”, “One to three times a month”, “Occasionally”, “Never”; for physical activity, it was categorized and adjusted in days from 0 to 7. (details in Supplementary Materials)
† Data are % or mean (SD) unless stated Median (IQR)

## Sheet: ST3
Supplementary Table 3: Multivariable regression, one-sample and two-sample Mendelian randomization analysis to assess the effects of sleep traits on HbA1c
Exposure (unit)	Outcome dataset (outcome unit)	Design		Outcome: HbA1c (SD unit)
				All participants						Excluding participants with diabetes defined by the Eastwood algorithm					Excluding participants with diabetes defined by the Eastwood algorithm and/or HbA1c >= 48 mmol/mol
				N	Beta	LCI	UCI	p-value	Sagarn test p-value / F-statistics / IGX2†	N	Beta	LCI	UCI	p-value	N	Beta	LCI	UCI	p-value
Insomnia symptoms (usually experiencing insomnia symptoms vs sometimes, rarely/never)‡	UKB (SD unit, 1SD = 0.15 log mmol/mol)	MVR	Model 1	302575	0.0509555	0.0434123	0.0584987	5.28153e-40	-	289014	0.0179086	0.0118199	0.0239973	8.1771e-09	287113	0.0158229	0.0101978	0.021448	3.52477e-08
			Model 2	301682	0.0302602	0.0228893	0.0376311	8.5502e-16	-	288218	0.00694771	0.000938671	0.0129568	0.0234417	286324	0.00659589	0.00103206	0.0121597	0.0201493
		1SMR	1SMRmain	320852	0.523167	0.418578	0.627756	1.08843e-22	4.2661e-72	305894	0.295229	0.211579	0.378879	4.60535e-12	303771	0.266163	0.189221	0.343105	1.2024e-11
			1SMRsensitivity1	-	0.467053	0.269537	0.664569	3.57496e-06	8.13589	-	-	-	-	-	-	-	-	-	-
			1SMRsensitivity2	-	0.187697	-0.367602	0.742997	0.507649	41% / 0.34	-	-	-	-	-	-	-	-	-	-
			1SMRsensitivity3	-	0.338529	0.195358	0.4817	3.57895e-06	-	-	-	-	-	-	-	-	-	-	-
			1SMRsensitivity1*	-	0.530691	0.215049	0.846333	0.000982939	6.76375	-	-	-	-	-	-	-	-	-	-
			1SMRsensitivity2*	-	0.33046	-0.414168	1.07509	0.384392	51% / 0.59	-	-	-	-	-	-	-	-	-	-
			1SMRsensitivity3*	-	0.461613	0.207616	0.715611	0.000367909	-	-	-	-	-	-	-	-	-	-	-
	MAGIC (SD unit, 1SD = 0.53%)	2SMR	2SMRmain	-	0.2354	0.108791	0.362009	0.000268263	-	-	-	-	-	-	-	-	-	-	-
			2SMRsensitivity1	-	0.154288	-0.027159	0.335735	0.0955885	-	-	-	-	-	-	-	-	-	-	-
			2SMRSensitivity2	-	0.669111	0.0230993	1.31512	0.043845	0.181385	-	-	-	-	-	-	-	-	-	-
24-hour sleep duration (per hr increase)	UKB (SD unit, 1SD = 0.15 log mmol/mol)	MVR	Model 1	301640	-0.00641489	-0.00955336	-0.00327642	6.17324e-05	-	288149	-0.0148944	-0.0174496	-0.0123391	3.19547e-30	286257	-0.0160382	-0.0184007	-0.0136756	2.21219e-40
			Model 2	300752	-0.00305528	-0.00612151	1.09566e-05	0.050821	-	287357	-0.0123896	-0.0149117	-0.00986755	6.11317e-22	285472	-0.0138663	-0.0162034	-0.0115292	2.98375e-31
		1SMR	1SMRmain	319362	-0.112108	-0.152712	-0.0715035	6.25309e-08	6.51938e-45	304531	-0.0625639	-0.095089	-0.0300388	0.000163164	302425	-0.0611954	-0.0911676	-0.0312232	6.28765e-05
			1SMRsensitivity1	-	-0.106017	-0.198124	-0.0139097	0.0240711	26.4247	-	-	-	-	-	-	-	-	-	-
			1SMRsensitivity2	-	0.0186598	-0.395428	0.432748	0.92962	56% / 0.53	-	-	-	-	-	-	-	-	-	-
			1SMRsensitivity3	-	-0.0342984	-0.080581	0.0119842	0.146367	-	-	-	-	-	-	-	-	-	-	-
	MAGIC (SD unit, 1SD = 0.53%)	2SMR	2SMRmain	-	-0.101952	-0.246456	0.0425523	0.166715	-	-	-	-	-	-	-	-	-	-	-
			2SMRsensitivity1	-	-0.130145	-0.316409	0.0561197	0.170852	-	-	-	-	-	-	-	-	-	-	-
			2SMRSensitivity2	-	-0.624787	-1.21158	-0.0379946	0.0418159	0.0777415	-	-	-	-	-	-	-	-	-	-
Short sleep duration (<=6 hours vs 7-8 hours)‡	UKB (SD unit, 1SD = 0.15 log mmol/mol)	MVR	Model 1	278955	0.0611872	0.0532263	0.0691481	2.90673e-51	-	267277	0.043724	0.0372507	0.0501973	5.39044e-40	265584	0.0421581	0.0361656	0.0481505	3.06906e-43
			Model 2	278167	0.0361857	0.0283952	0.0439762	8.77059e-20	-	266567	0.028898	0.0225037	0.0352924	8.20438e-19	264879	0.0297172	0.0237852	0.0356491	9.41076e-23
		1SMR	1SMRmain	294833	0.328988	0.153853	0.504124	0.000231613	3.39513e-07	282035	0.269232	0.127734	0.410731	0.000192028	280145	0.230586	0.100165	0.361007	0.000529699
			1SMRsensitivity1	-	0.341327	0.0622574	0.620397	0.0165184	23.8098	-	-	-	-	-	-	-	-	-	-
			1SMRsensitivity2	-	0.531319	-0.983294	2.04593	0.491731	46% / 0.78	-	-	-	-	-	-	-	-	-	-
			1SMRsensitivity3	-	0.589164	0.0523954	1.12593	0.0314509	-	-	-	-	-	-	-	-	-	-	-
	MAGIC (SD unit, 1SD = 0.53%)	2SMR	2SMRmain	-	0.238175	-0.466044	0.942394	0.507398	-	-	-	-	-	-	-	-	-	-	-
			2SMRsensitivity1	-	0.340205	-0.47334	1.15375	0.41243	-	-	-	-	-	-	-	-	-	-	-
			2SMRSensitivity2	-	1.694	-1.13632	4.52433	0.256048	0.311772	-	-	-	-	-	-	-	-	-	-
Long sleep duration (>=9 hours vs 7-8 hours)‡	UKB (SD unit, 1SD = 0.15 log mmol/mol)	MVR	Model 1	231044	0.0807536	0.067924	0.0935833	5.88504e-35	-	221096	0.00142974	-0.00916258	0.0120221	0.791349	219704	-0.00597192	-0.0157746	0.00383076	0.232457
			Model 2	230390	0.052864	0.0402989	0.0654291	1.64486e-16	-	220512	-0.0124919	-0.0229555	-0.00202841	0.0192869	219127	-0.0174287	-0.0271301	-0.00772727	0.000429758
		1SMR	1SMRmain	243632	-0.501169	-0.990001	-0.0123365	0.0444891	3.53255e-10	232739	0.102186	-0.272143	0.476514	0.592617	231202	0.051632	-0.294474	0.397738	0.769987
			1SMRsensitivity1	-	-0.223983	-1.59043	1.14246	0.748001	26.926	-	-	-	-	-	-	-	-	-	-
			1SMRsensitivity2	-	2.62833	-2.1746	7.43127	0.28346	71% / 0.30	-	-	-	-	-	-	-	-	-	-
			1SMRsensitivity3	-	-0.184287	-1.54933	1.18076	0.791311	-	-	-	-	-	-	-	-	-	-	-
	MAGIC (SD unit, 1SD = 0.53%)	2SMR	2SMRmain	-	-1.94775	-3.47766	-0.417837	0.0125851	-	-	-	-	-	-	-	-	-	-	-
			2SMRsensitivity1	-	-1.95278	-3.65499	-0.250568	0.0245434	-	-	-	-	-	-	-	-	-	-	-
			2SMRSensitivity2	-	-1.46366	-8.26806	5.34074	0.701699	0.894372	-	-	-	-	-	-	-	-	-	-
Daytime sleepiness (per category increase)	UKB (SD unit, 1SD = 0.15 log mmol/mol)	MVR	Model 1	302078	0.0860196	0.0790794	0.0929597	3.08637e-130	-	288572	0.0389473	0.033289	0.0446056	1.81671e-41	286676	0.0335477	0.0283152	0.0387803	3.30838e-36
			Model 2	301192	0.0634842	0.0566918	0.0702766	6.42214e-75	-	287781	0.0279039	0.0223141	0.0334937	1.32792e-22	285892	0.0244746	0.0192942	0.0296549	2.05868e-20
		1SMR	1SMRmain	320013	0.14162	0.0181301	0.26511	0.0245924	9.61746e-38	305160	0.0755413	-0.0235023	0.174585	0.13494	303046	0.0656631	-0.0256514	0.156978	0.158714
			1SMRsensitivity1	-	0.134384	-0.227812	0.496581	0.467097	28.1186	-	-	-	-	-	-	-	-	-	-
			1SMRsensitivity2	-	0.148865	-1.45233	1.75006	0.855407	55% / 0.93	-	-	-	-	-	-	-	-	-	-
			1SMRsensitivity3	-	0.477312	0.00415179	0.950473	0.0480192	-	-	-	-	-	-	-	-	-	-	-
			1SMRsensitivity1*	-	0.23387	-0.207781	0.675521	0.299321	36.5438	-	-	-	-	-	-	-	-	-	-
			1SMRsensitivity2*	-	0.885712	-1.65641	3.42783	0.494674	58% / 0.60	-	-	-	-	-	-	-	-	-	-
			1SMRsensitivity3*	-	0.454452	-0.118611	1.02751	0.120107	-	-	-	-	-	-	-	-	-	-	-
	MAGIC (SD unit, 1SD = 0.53%)	2SMR	2SMRmain	-	0.117729	-0.414118	0.649576	0.664388	-	-	-	-	-	-	-	-	-	-	-
			2SMRsensitivity1	-	0.271286	-0.30739	0.849962	0.35817	-	-	-	-	-	-	-	-	-	-	-
			2SMRSensitivity2	-	0.649047	-2.22608	3.52418	0.662118	0.715511	-	-	-	-	-	-	-	-	-	-
Daytime napping (per category increase)	UKB (SD unit, 1SD = 0.15 log mmol/mol)	MVR	Model 1	302677	0.0869206	0.0811218	0.0927194	1.87292e-189	-	289107	0.0324712	0.027775	0.0371674	7.93537e-42	287205	0.023727	0.0193851	0.0280689	9.16745e-27
			Model 2	301784	0.0563393	0.0506522	0.0620265	6.28294e-84	-	288311	0.0156558	0.0110087	0.020303	4.03482e-11	286416	0.00985587	0.00555069	0.0141611	7.22482e-06
		1SMR	1SMRmain	320957	0.0856902	0.0284043	0.142976	0.00336991	1.18453e-43	305994	0.0187558	-0.027298	0.0648096	0.42474	303871	0.0171941	-0.0251644	0.0595525	0.426265
			1SMRsensitivity1	-	0.0953836	-0.0215414	0.212309	0.109842	31.2086	-	-	-	-	-	-	-	-	-	-
			1SMRsensitivity2	-	0.263745	-0.203361	0.730851	0.268429	66% / 0.46	-	-	-	-	-	-	-	-	-	-
			1SMRsensitivity3	-	0.116903	-0.0435365	0.277343	0.153252	-	-	-	-	-	-	-	-	-	-	-
			1SMRsensitivity1*	-	0.0376201	-0.238851	0.314091	0.789699	60.426	-	-	-	-	-	-	-	-	-	-
			1SMRsensitivity2*	-	0.503707	-0.792665	1.80008	0.446323	82% / 0.46	-	-	-	-	-	-	-	-	-	-
			1SMRsensitivity3*	-	0.141695	-0.0995831	0.382974	0.249713	-	-	-	-	-	-	-	-	-	-	-
	MAGIC (SD unit, 1SD = 0.53%)	2SMR	2SMRmain	-	-0.0918748	-0.322204	0.138455	0.434324	-	-	-	-	-	-	-	-	-	-	-
			2SMRsensitivity1	-	-0.0335713	-0.359693	0.29255	0.840101	-	-	-	-	-	-	-	-	-	-	-
			2SMRSensitivity2	-	0.422715	-0.276813	1.12224	0.240318	0.131768	-	-	-	-	-	-	-	-	-	-
Chronotype (per category increase to evening preference)	UKB (SD unit, 1SD = 0.15 log mmol/mol)	MVR	Model 1	302257	0.00841054	0.00580117	0.0110199	2.66218e-10	-	288711	0.00124682	-0.000855871	0.00334951	0.245151	286811	0.000978948	-0.00096348	0.00292138	0.32325
			Model 2	301366	0.00443055	0.00188289	0.00697821	0.000653133	-	287917	-0.000962801	-0.00303687	0.00111127	0.362903	286024	-0.000921574	-0.00284185	0.000998699	0.34689
		1SMR	1SMRmain	320400	0.0217375	0.00398183	0.0394931	0.0164161	1.31638e-96	305466	0.00605882	-0.00822087	0.0203385	0.405624	303345	0.00803525	-0.00508887	0.0211594	0.230136
			1SMRsensitivity1	-	0.0110982	-0.0249102	0.0471066	0.54578	22.9035	-	-	-	-	-	-	-	-	-	-
			1SMRsensitivity2	-	-0.092882	-0.208038	0.0222736	0.113902	65% / 0.05	-	-	-	-	-	-	-	-	-	-
			1SMRsensitivity3	-	-0.00647309	-0.0281457	0.0151995	0.558275	-	-	-	-	-	-	-	-	-	-	-
			1SMRsensitivity1*	-	-0.0013483	-0.0744187	0.0717222	0.97115	34.7922	-	-	-	-	-	-	-	-	-	-
			1SMRsensitivity2*	-	-0.162539	-0.333445	0.00836737	0.062316	0.857039	-	-	-	-	-	-	-	-	-	-
			1SMRsensitivity3*	-	-0.00446978	-0.0500566	0.041117	0.847603	-	-	-	-	-	-	-	-	-	-	-
	MAGIC (SD unit, 1SD = 0.53%)	2SMR	2SMRmain	-	0.00197706	-0.0307418	0.0346959	0.905724	-	-	-	-	-	-	-	-	-	-	-
			2SMRsensitivity1	-	-0.00696739	-0.0573765	0.0434418	0.786464	-	-	-	-	-	-	-	-	-	-	-
			2SMRSensitivity2	-	-0.0406261	-0.138278	0.0570257	0.415614	0.36497	-	-	-	-	-	-	-	-	-	-
MVR: multivariable regressions, 1SMR: one-sample Mendelian randomization, IVW: inverse-variance weighted, LADreg: LAD regression, WM: weighted median; SNP: single-nucleotide polymorphism; UKB: UK Biobank, MAGIC: Meta-Analyses of Glucose and Insulin-related traits Consortium, SD: standard deviation
MVR model 1: multivariable regression adjusted for sex, age, assessment centre, 40 genetic principal components, smoking, alcohol intake, Townsend deprivation, education, vigorous physical activity levels, and sleep apnoea in the UKB
MVR model 2: MVR Model 1 additionally adjusted for BMI.
1SMR main was equivalent to two-stage least square in 1SMR applying to the UKB; 1SMRsensitivity1, 1SMRsensitivity2, and 1SMRsensitivity3 were equivalent to collider-corrected IVW, MR-Egger, and least absolute deviations (LAD) regression in 1SMR respectively applying to the UKB; 2SMRmain, 2SMRsensitivity1, 2SMRsensitivity2 were equivalent to IVW, Weighted Median, and MR-Egger in 2SMR respectively …
1SMRmain (2SLS) adjusted for sex, age, assessment centre, chip, 40 genetic principal components in the UKB
For 1SMRsensitivity analyses (collider-corrected IVW, MR-Egger, and least absolute deviations (LAD) regression), summary statistics (i.e., βXG, seβXG, βYG, seβYG, β*, seβ*, α*,seα*) were obtained from the linear regression adjusted for age, sex, chip, assessment centre, and 40 genetic principal components in the UKB.
1SMRsensitivity1*, 1SMRsensitivity2*, and 1SMRsensitivity3* were collider corrected IVW, MR-Egger, and LADreg accounting for winner's curse: for insomnia symptoms: a subset of 108 SNPs were identified in Jansen et al GWAS, when analyses were run in the 23andMe separately; for excessive daytime sleepiness: a subset of 19 SNPs were identified in Wang H et al GWAS, when analyses were ran in 337,539 …
Sagarn test p-value / F-statistics / IGX2†: In the row of "1SMRmain" , the value indicates Sagarn test p-value; in the rows of "1SMRsensitivity1" and "1SMRsensitivity1*", the value indicates F statistics; in the rows of "1SMRsensitivity2" and "1SMRsensitivity2*", the front value indicates IGX2 and the following value indicates p-value for MR-Egger intercept term.
‡ For the 2SMR estimates of the binary exposures (i.e., insomnia trait, short sleep, long sleep), we converted the results of the SNP-binary sleep trait from the multiplicative log odds scale to a difference in risk scale by beta = log-odds * u * (1-u), sebeta = selog-odds * u * (1-u), where u = Ncase / (Ncase + Ncontrol).

## Sheet: ST4
Supplementary Table 4: Multivariable Mendelian randomization analysis to assess the effects of insomnia symptoms and BMI on HbA1c in the UK Biobank
Design	Exposure (unit)	Outcome: HbA1c (SD unit, 1SD = 0.15 log mmol/mol)
		N	Beta	LCI	UCI	p-value
MVMR	Insomnia symptoms (usually experiencing insomnia symptoms vs sometimes, rarely/never)	319827	0.0458517	0.0296728	0.0620306	2.78263e-08
	BMI (per unit increase)	319827	0.005971	0.00507906	0.00686293	2.55067e-39
UVMR	BMI (per unit increase)	320050	0.040663	0.0347814	0.0465445	8.05624e-42
MVMR: multivariable Mendelian randomization; UVMR: univariable Mendelian randomization
The instrument strength of the unweighted allele score of BMI is 5,117 with R2 = 1.5%; the Sanderson–Windmeijer conditional F statistics of the unweighted allele score of insomnia symptoms and BMI are 1596 and 3970.

## Sheet: ST5
Supplementary Table 5: Multivariable regression, one-sample and two-sample Mendelian randomization analysis to assess the effects of sleep traits on glucose
Exposure (unit)	Outcome dataset (outcome unit)	Design		Outcome: glucose in UKB, fasting glucose in MAGIC (SD unit)
				All participants						Excluding participants with diabetes defined by the Eastwood algorithm					Excluding participants with diabetes defined by the Eastwood algorithm and/or HbA1c >= 48 mmol/mol
				N	Beta	LCI	UCI	p-value	Sagarn test p-value / F-statistics / IGX2†	N	Beta	LCI	UCI	p-value	N	Beta	LCI	UCI	p-value
Insomnia symptoms (usually experiencing insomnia symptoms vs sometimes, rarely/never) ‡	UKB (SD unit, 1SD = 0.17 log mmol/l)	MVR	Model 1	276891	0.0384906	0.0301027	0.0468785	2.39678e-19	-	264577	0.00756448	0.000804157	0.0143248	0.0282977	250784	0.00437293	-0.00212323	0.0108691	0.187041
			Model 1^	275179	0.0382763	0.0298795	0.046673	4.1122e-19	-	262938	0.00736184	0.000595741	0.0141279	0.0329606	249223	0.00398819	-0.00251177	0.0104882	0.229132
			Model 2	276087	0.022236	0.0139492	0.0305229	1.44733e-07	-	263860	-0.000494661	-0.0072222	0.00623288	0.88541	250101	-0.00232511	-0.00879741	0.00414719	0.481365
			Model 2^	274384	0.0221336	0.0138384	0.0304289	1.69891e-07	-	262228	-0.000625388	-0.00735817	0.0061074	0.855537	248547	-0.00263687	-0.0091127	0.00383895	0.424821
		1SMR	1SMRmain1	293629	0.330983	0.216217	0.445748	1.58158e-08	5.55286e-15	280047	0.145523	0.0534601	0.237587	0.00194752	265377	0.018324	0.0201223	0.195454	0.0159581
			1SMRmain1^	291773	0.333585	0.218865	0.448305	1.20404e-08		278275	0.146959	0.0549983	0.23892	0.0017352	263691	0.110687	0.0231227	0.19825	0.0132286
			1SMRsensitivity1	-	0.290328	0.129152	0.451503	0.00041465	7.35572	-	-	-	-	-	-	-	-	-	-
			1SMRsensitivity2	-	0.189455	-0.269867	0.648777	0.418841	34% / 0.76	-	-	-	-	-	-	-	-	-	-
			1SMRsensitivity3	-	0.240725	-0.0158097	0.49726	0.0658844	-	-	-	-	-	-	-	-	-	-	-
			1SMRsensitivity1*	-	0.271706	0.0252931	0.51812	0.0306811	6.20844	-	-	-	-	-	-	-	-	-	-
			1SMRsensitivity2*	-	-0.0412682	-0.67403	0.591494	0.898284	46% / 0.26	-	-	-	-	-	-	-	-	-	-
			1SMRsensitivity3*	-	0.187802	-0.243357	0.618961	0.393256	-	-	-	-	-	-	-	-	-	-	-
	MAGIC (SD unit, 1SD = 0.73 mmol/l)	2SMR	2SMRmain	-	0.0954335	-7.80771e-05	0.190945	0.0501834	-	-	-	-	-	-	-	-	-	-	-
			2SMRsensitivity1	-	0.0757954	-0.0664734	0.218064	0.296387	-	-	-	-	-	-	-	-	-	-	-
			2SMRSensitivity2	-	-0.0618732	-0.551252	0.427506	0.804573	0.521464	-	-	-	-	-	-	-	-	-	-
24-hour sleep duration (per hr increase)	UKB (SD unit, 1SD = 0.17 log mmol/l)	MVR	Model 1	276062	0.00596428	0.00247407	0.00945449	0.00081008	-	263811	-0.0012028	-0.0040398	0.0016342	0.405987	250069	-0.00219781	-0.00492425	0.000528623	0.114113
			Model 1^	274358	0.0055645	0.00206949	0.00905951	0.00180519	-	262180	-0.00128345	-0.00412384	0.00155694	0.375812	248516	-0.00221702	-0.00494591	0.000511877	0.111307
			Model 2	275262	0.00843669	0.00498933	0.011884	1.61394e-06	-	263097	0.000698497	-0.00212476	0.00352175	0.627733	249389	-0.000641855	-0.00335834	0.00207464	0.643285
			Model 2^	273567	0.00797116	0.00451916	0.0114232	6.01582e-06	-	261473	0.000547674	-0.00227875	0.0033741	0.704103	247843	-0.00073073	-0.00344956	0.0019881	0.598345
		1SMR	1SMRmain	292300	-0.0390264	-0.0825833	0.00453052	0.0790668	4.4432e-15	278827	-0.0017552	-0.0367954	0.033285	0.921791	264232	-0.00205419	-0.0458096	0.0216426	0.482534
			1SMRmain^	290455	-0.0418229	-0.0855199	0.00187409	0.0606647	-	277066	-0.00328046	-0.0384361	0.0318751	0.854882	262557	-0.0126438	-0.0464411	0.0211535	0.463408
			1SMRsensitivity1	-	-0.0453308	-0.11747	0.0268086	0.218091	24.8655	-	-	-	-	-	-	-	-	-	-
			1SMRsensitivity2	-	-0.0763595	-0.417155	0.264436	0.660544	51% / 0.83	-	-	-	-	-	-	-	-	-	-
			1SMRsensitivity3	-	-0.0403318	-0.104258	0.0235941	0.216238	-	-	-	-	-	-	-	-	-	-	-
	MAGIC (SD unit, 1SD = 0.73 mmol/l)	2SMR	2SMRmain	-	-0.0423645	-0.167195	0.0824662	0.505938	-	-	-	-	-	-	-	-	-	-	-
			2SMRsensitivity1	-	-0.00130805	-0.145772	0.143156	0.985841	-	-	-	-	-	-	-	-	-	-	-
			2SMRSensitivity2	-	-0.235188	-0.745818	0.275441	0.370904	0.448688	-	-	-	-	-	-	-	-	-	-
Short sleep duration (<=6 hours vs 7-8 hours) ‡	UKB (SD unit, 1SD = 0.17 log mmol/l)	MVR	Model 1	255353	0.0315637	0.0227236	0.0404039	2.59897e-12	-	244713	0.0158336	0.00864775	0.0230194	1.56977e-05	231987	0.0148957	0.00798589	0.0218055	2.38784e-05
			Model 1^	253793	0.0323777	0.0235227	0.0412326	7.70586e-13	-	243213	0.0159408	0.00874604	0.0231355	1.40857e-05	230560	0.0149337	0.0080176	0.0218498	2.31542e-05
			Model 2	254647	0.0117123	0.00296753	0.0204571	0.00866226	-	244075	0.00449708	-0.00265753	0.0116517	0.217961	231378	0.00562142	-0.00126573	0.0125086	0.109647
			Model 2^	253094	0.0128237	0.00406583	0.0215815	0.00410592	-	242581	0.00480102	-0.00236162	0.0119637	0.188928	229957	0.0058498	-0.001043	0.0127426	0.0962301
		1SMR	1SMRmain	269881	0.172938	-0.0149302	0.360806	0.0711956	0.0144231	258227	0.10952	-0.0418086	0.260848	0.156047	244734	0.0165745	-0.0496256	0.24462	0.193987
			1SMRmain^	268197	0.18207	-0.0064613	0.370602	0.0583819	-	256612	0.112677	-0.0390623	0.264417	0.145549	243198	0.0992045	-0.0483194	0.246728	0.187495
			1SMRsensitivity1	-	0.173024	-0.0568663	0.402915	0.140167	22.4404	-	-	-	-	-	-	-	-	-	-
			1SMRsensitivity2	-	0.222172	-1.07628	1.52063	0.737349	39% / 0.95	-	-	-	-	-	-	-	-	-	-
			1SMRsensitivity3	-	0.39762	-0.00225803	0.797497	0.0513035	-	-	-	-	-	-	-	-	-	-	-
	MAGIC (SD unit, 1SD = 0.73 mmol/l)	2SMR	2SMRmain	-	0.263708	-0.165195	0.692611	0.228167	-	-	-	-	-	-	-	-	-	-	-
			2SMRsensitivity1	-	0.276457	-0.283828	0.836742	0.333491	-	-	-	-	-	-	-	-	-	-	-
			2SMRSensitivity2	-	-0.744424	-2.49123	1.00239	0.414512	0.258756	-	-	-	-	-	-	-	-	-	-
Long sleep duration (>=9 hours vs 7-8 hours) ‡	UKB (SD unit, 1SD = 0.17 log mmol/l)	MVR	Model 1	211428	0.0849798	0.0706657	0.099294	2.76174e-31	-	202400	0.0162863	0.0044961	0.0280765	0.00678119	191845	0.0107311	-0.00060983	0.0220719	0.0636541
			Model 1^	210142	0.0839516	0.0696188	0.0982844	1.69215e-30	-	201162	0.0159607	0.00415465	0.0277667	0.00805592	190668	0.0103676	-0.000984956	0.0217202	0.0734636
			Model 2	210848	0.0623971	0.0482347	0.0765595	5.89053e-18	-	201880	0.00570701	-0.00603156	0.0174456	0.340639	191350	0.00214544	-0.00915654	0.0134474	0.709845
			Model 2^	209567	0.0616588	0.0474786	0.0758389	1.57059e-17	-	200646	0.00537839	-0.00637516	0.0171319	0.369778	190177	0.00178965	-0.00952359	0.0131029	0.75652
		1SMR	1SMRmain	222974	-0.579321	-1.13956	-0.0190867	0.0426866	0.00705487	213083	-0.0464438	-0.475901	0.383014	0.832135	201942	-0.0128689	-0.486012	0.334613	0.717647
			1SMRmain^	221584	-0.576113	-1.1308	-0.0214288	0.0417797	-	211747	-0.0346675	-0.459249	0.389914	0.872853	200673	-0.0555915	-0.460573	0.34939	0.787893
			1SMRsensitivity1	-	-0.280136	-1.11689	0.556619	0.511705	24.6383	-	-	-	-	-	-	-	-	-	-
			1SMRsensitivity2	-	1.36885	-0.578543	3.31625	0.168292	80% / 0.14	-	-	-	-	-	-	-	-	-	-
			1SMRsensitivity3	-	0.34313	-0.478184	1.16444	0.41287	-	-	-	-	-	-	-	-	-	-	-
	MAGIC (SD unit, 1SD = 0.73 mmol/l)	2SMR	2SMRmain	-	-0.175909	-1.28518	0.933363	0.755939	-	-	-	-	-	-	-	-	-	-	-
			2SMRsensitivity1	-	-0.096693	-1.43961	1.24622	0.887772	-	-	-	-	-	-	-	-	-	-	-
			2SMRSensitivity2	-	1.57661	-2.89236	6.04557	0.538977	0.484156	-	-	-	-	-	-	-	-	-	-
Daytime sleepiness (per category increase)	UKB (SD unit, 1SD = 0.17 log mmol/l)	MVR	Model 1	276437	0.0342554	0.0265267	0.0419842	3.73521e-18	-	264175	-0.00649212	-0.0127805	-0.000203743	0.0430222	250413	-0.0107017	-0.0167462	-0.00465724	0.000520211
			Model 1^	274731	0.0341004	0.0263634	0.0418375	5.72263e-18	-	262542	-0.00648894	-0.0127825	-0.000195367	0.043297	248858	-0.0105955	-0.0166433	-0.00454773	0.00059517
			Model 2	275639	0.0167434	0.00909762	0.0243891	1.76979e-05	-	263462	-0.0145309	-0.0207937	-0.00826821	5.42754e-06	249734	-0.0172691	-0.0232957	-0.0112425	1.95256e-08
			Model 2^	273942	0.0166823	0.00902868	0.0243359	1.93673e-05	-	261836	-0.014546	-0.0208134	-0.0082785	5.39507e-06	248186	-0.0171563	-0.0231859	-0.0111266	2.45264e-08
		1SMR	1SMRmain	292873	0.00912013	-0.123698	0.141938	0.892939	5.88613e-22	279387	0.000485784	-0.105454	0.106426	0.992829	264766	0.00223688	-0.0887104	0.115027	0.800138
			1SMRmain^	291773	0.333585	0.218865	0.448305	1.20404e-08	-	277626	-0.00447956	-0.110519	0.10156	0.934011	263091	0.0118015	-0.0901976	0.113801	0.820599
			1SMRsensitivity1	-	0.0404772	-0.254366	0.335321	0.787871	27.0926	-	-	-	-	-	-	-	-	-	-
			1SMRsensitivity2	-	0.59297	-0.751134	1.93707	0.387214	57% / 0.35	-	-	-	-	-	-	-	-	-	-
			1SMRsensitivity3	-	0.251962	0.0113161	0.492608	0.0401534	-	-	-	-	-	-	-	-	-	-	-
			1SMRsensitivity1*	-	0.0372017	-0.353362	0.427766	0.851902	35.4525	-	-	-	-	-	-	-	-	-	-
			1SMRsensitivity2*	-	1.40671	-0.910013	3.72343	0.234004	62% / 0.23	-	-	-	-	-	-	-	-	-	-
			1SMRsensitivity3*	-	0.236132	-0.0448144	0.517078	0.099485	-	-	-	-	-	-	-	-	-	-	-
	MAGIC (SD unit, 1SD = 0.73 mmol/l)	2SMR	2SMRmain	-	-0.226569	-0.755087	0.301949	0.400781	-	-	-	-	-	-	-	-	-	-	-
			2SMRsensitivity1	-	-0.158212	-0.598047	0.281622	0.480792	-	-	-	-	-	-	-	-	-	-	-
			2SMRSensitivity2	-	0.24648	-2.64172	3.13468	0.868561	0.746692	-	-	-	-	-	-	-	-	-	-
Daytime napping (per category increase)	UKB (SD unit, 1SD = 0.17 log mmol/l)	MVR	Model 1	276989	0.0642624	0.0578228	0.070702	3.92408e-85	-	264667	0.0185114	0.0133069	0.023716	3.14766e-12	250872	0.0121464	0.00714228	0.0171506	1.96156e-06
			Model 1^	275277	0.0642647	0.0578173	0.070712	6.14611e-85	-	263028	0.0187177	0.0135083	0.0239272	1.89481e-12	249311	0.012284	0.00727646	0.0172916	1.52498e-06
			Model 2	276185	0.0408285	0.0344464	0.0472107	4.6912e-36	-	263950	0.00666605	0.00147434	0.0118577	0.0118498	250189	0.00239475	-0.00260234	0.00739184	0.347584
			Model 2^	274482	0.0407902	0.0344004	0.04718	6.57028e-36	-	262318	0.00682776	0.00163137	0.0120241	0.0100151	248635	0.00251903	-0.00248147	0.00751952	0.323467
		1SMR	1SMRmain	280347	0.0864859	0.0227261	0.150246	0.00784689	2.10156e-07	267338	0.0484623	-0.00280824	0.0997328	0.0639344	265473	0.00952904	0.0080383	0.104068	0.0221308
			1SMRmain^	278563	0.0875303	0.0237778	0.151283	0.00712372	-	265634	0.0518298	0.000573785	0.103086	0.0474869	263787	0.060609	0.0126278	0.10859	0.013293
			1SMRsensitivity1	-	0.0963511	0.00875789	0.183944	0.0310862	28.7896	-	-	-	-	-	-	-	-	-	-
			1SMRsensitivity2	-	0.32836	-0.0105335	0.667254	0.057554	64% / 0.15	-	-	-	-	-	-	-	-	-	-
			1SMRsensitivity3	-	0.0805282	-0.0484519	0.209508	0.221059	-	-	-	-	-	-	-	-	-	-	-
			1SMRsensitivity1*	-	0.0371804	-0.15097	0.225331	0.698523	55.5611	-	-	-	-	-	-	-	-	-	-
			1SMRsensitivity2*	-	0.339194	-0.48094	1.15933	0.417581	81% / 0.43	-	-	-	-	-	-	-	-	-	-
			1SMRsensitivity3*	-	0.137853	-0.0671135	0.34282	0.187428	-	-	-	-	-	-	-	-	-	-	-
	MAGIC (SD unit, 1SD = 0.73mmol/l)	2SMR	2SMRmain	-	-0.0509552	-0.258325	0.156415	0.63008	-	-	-	-	-	-	-	-	-	-	-
			2SMRsensitivity1	-	-0.103686	-0.351049	0.143676	0.411321	-	-	-	-	-	-	-	-	-	-	-
			2SMRSensitivity2	-	-0.17863	-0.820053	0.462793	0.586936	0.681204	-	-	-	-	-	-	-	-	-	-
Chronotype (per category increase to evening preference)	UKB (SD unit, 1SD = 0.17 log mmol/l)	MVR	Model 1	276602	0.0104389	0.00754026	0.0133375	1.68608e-12	-	264303	0.00425708	0.00192467	0.00658948	0.000347138	250521	0.00385887	0.00161843	0.00609931	0.00073599
			Model 1^	274892	0.0108434	0.00794151	0.0137453	2.41593e-13	-	262666	0.0044412	0.00210667	0.00677573	0.000192517	248962	0.00403435	0.00179244	0.00627627	0.000420298
			Model 2	275800	0.00719224	0.00433089	0.0100536	8.3716e-07	-	263589	0.00261493	0.000295609	0.00493425	0.0271191	249840	0.00236527	0.000134215	0.00459632	0.0377187
			Model 2^	274099	0.00763892	0.00477441	0.0105034	1.72579e-07	-	261958	0.00280008	0.000478322	0.00512183	0.0180896	248288	0.00257519	0.000342733	0.00480765	0.023766
		1SMR	1SMRmain	293213	0.036233	0.0166931	0.0557729	0.000278634	6.00152e-26	279655	0.0181798	0.00242575	0.033934	0.023711	265000	0.00301962	0.00267995	0.032845	0.0209852
			1SMRmain^	291361	0.0376529	0.0180845	0.0572213	0.000162383	-	277887	0.0192825	0.00350444	0.0350605	0.0166059	263318	0.018867	0.00376135	0.0339727	0.014364
			1SMRsensitivity1	-	0.0287635	-2.1381e-05	0.0575483	0.0501662	20.8745	-	-	-	-	-	-	-	-	-	-
			1SMRsensitivity2	-	-0.0452014	-0.140118	0.0497155	0.350617	64% / 0.46	-	-	-	-	-	-	-	-	-	-
			1SMRsensitivity3	-	0.026086	-0.0162531	0.0684251	0.227202	-	-	-	-	-	-	-	-	-	-	-
			1SMRsensitivity1*	-	0.0409088	-0.0229878	0.104805	0.20953	31.7615	-	-	-	-	-	-	-	-	-	-
			1SMRsensitivity2*	-	-0.0335676	-0.176285	0.10915	0.6448	85% / 0.23	-	-	-	-	-	-	-	-	-	-
			1SMRsensitivity3*	-	0.0885829	0.0120259	0.16514	0.0233361	-	-	-	-	-	-	-	-	-	-	-
	MAGIC (SD unit, 1SD = 0.73 mmol/l)	2SMR	2SMRmain	-	0.00255015	-0.0233183	0.0284186	0.846787	-	-	-	-	-	-	-	-	-	-	-
			2SMRsensitivity1	-	0.00537698	-0.0334355	0.0441894	0.785981	-	-	-	-	-	-	-	-	-	-	-
			2SMRSensitivity2	-	-0.00792124	-0.0867364	0.0708939	0.844	0.782979	-	-	-	-	-	-	-	-	-	-
MVR: multivariable regressions, 1SMR: one-sample Mendelian randomization, IVW: inverse-variance weighted, LADreg: LAD regression, WM: weighted median; SNP: single-nucleotide polymorphism; UKB: UK Biobank, MAGIC: Meta-Analyses of Glucose and Insulin-related traits Consortium, SD: standard deviation
MVR model 1: multivariable regression adjusted for sex, age, assessment centre, 40 genetic principal components, smoking, alcohol intake, Townsend deprivation, education, vigorous physical activity levels, and sleep apnoea in the UKB.
MVR model 1^: MVR Model 1 additionally adjusted for dilution factor and fasting time
MVR model 2: multivariable regression adjusted for sex, age, assessment centre, 40 genetic principal components, smoking, alcohol intake, Townsend deprivation, education, vigorous physical activity levels, sleep apnoea, and BMI in the UKB
MVR model 2^: MVR Model 2 additionally adjusted for dilution factor and fasting time
1SMR main was equivalent to two-stage least square in 1SMR applying to the UKB; 1SMRsensitivity1, 1SMRsensitivity2, and 1SMRsensitivity3 were equivalent to collider-corrected IVW, MR-Egger, and least absolute deviations (LAD) regression in 1SMR respectively applying to the UKB; 2SMRmain, 2SMRsensitivity1, 2SMRsensitivity2 were equivalent to IVW, Weighted Median, and MR-Egger in 2SMR respectively …
1SMRmain (2SLS) adjusted for sex, age, assessment centre, chip, 40 genetic principal components in the UKB
1SMRmain^: 1SMRmain (2SLS) additionally adjusted for dilution factor and fasting time in the UKB
For 1SMRsensitivity analyses (collider-corrected IVW, MR-Egger, and least absolute deviations (LAD) regression), summary statistics (i.e., βXG, seβXG, βYG, seβYG, β*, seβ*, α*,seα*) were obtained from the linear regression adjusted for age, sex, chip, assessment centre, and 40 genetic principal components in the UKB.
1SMRsensitivity1*, 1SMRsensitivity2*, and 1SMRsensitivity3* were collider corrected IVW, MR-Egger, and LADreg accounting for winner's curse: for insomnia symptoms: a subset of 108 SNPs were identified in Jansen et al GWAS, when analyses were run in the 23andMe separately; for excessive daytime sleepiness: a subset of 19 SNPs were identified in Wang H et al GWAS, when analyses were ran in 337,539 …	1SMRsensitivity1*, 1SMRsensitivity2*, and 1SMRsensitivity3* were collider corrected IVW, MR-Egger, and LADreg accounting for winner's curse: for insomnia: a subset of 108 SNPs were identified in Jansen et al GWAS, when analyses were run in the 23andMe separately; for excessive daytime sleepiness: a subset of 19 SNPs were identified in Wang H et al GWAS, when analyses were ran in 337,539 unrelated…	1SMRsensitivity1*, 1SMRsensitivity2*, and 1SMRsensitivity3* were collider corrected IVW, MR-Egger, and LADreg accounting for winner's curse: for insomnia: a subset of 108 SNPs were identified in Jansen et al GWAS, when analyses were run in the 23andMe separately; for excessive daytime sleepiness: a subset of 19 SNPs were identified in Wang H et al GWAS, when analyses were ran in 337,539 unrelated…	1SMRsensitivity1*, 1SMRsensitivity2*, and 1SMRsensitivity3* were collider corrected IVW, MR-Egger, and LADreg accounting for winner's curse: for insomnia: a subset of 108 SNPs were identified in Jansen et al GWAS, when analyses were run in the 23andMe separately; for excessive daytime sleepiness: a subset of 19 SNPs were identified in Wang H et al GWAS, when analyses were ran in 337,539 unrelated…	1SMRsensitivity1*, 1SMRsensitivity2*, and 1SMRsensitivity3* were collider corrected IVW, MR-Egger, and LADreg accounting for winner's curse: for insomnia: a subset of 108 SNPs were identified in Jansen et al GWAS, when analyses were run in the 23andMe separately; for excessive daytime sleepiness: a subset of 19 SNPs were identified in Wang H et al GWAS, when analyses were ran in 337,539 unrelated…	1SMRsensitivity1*, 1SMRsensitivity2*, and 1SMRsensitivity3* were collider corrected IVW, MR-Egger, and LADreg accounting for winner's curse: for insomnia: a subset of 108 SNPs were identified in Jansen et al GWAS, when analyses were run in the 23andMe separately; for excessive daytime sleepiness: a subset of 19 SNPs were identified in Wang H et al GWAS, when analyses were ran in 337,539 unrelated…	1SMRsensitivity1*, 1SMRsensitivity2*, and 1SMRsensitivity3* were collider corrected IVW, MR-Egger, and LADreg accounting for winner's curse: for insomnia: a subset of 108 SNPs were identified in Jansen et al GWAS, when analyses were run in the 23andMe separately; for excessive daytime sleepiness: a subset of 19 SNPs were identified in Wang H et al GWAS, when analyses were ran in 337,539 unrelated…	1SMRsensitivity1*, 1SMRsensitivity2*, and 1SMRsensitivity3* were collider corrected IVW, MR-Egger, and LADreg accounting for winner's curse: for insomnia: a subset of 108 SNPs were identified in Jansen et al GWAS, when analyses were run in the 23andMe separately; for excessive daytime sleepiness: a subset of 19 SNPs were identified in Wang H et al GWAS, when analyses were ran in 337,539 unrelated…	1SMRsensitivity1*, 1SMRsensitivity2*, and 1SMRsensitivity3* were collider corrected IVW, MR-Egger, and LADreg accounting for winner's curse: for insomnia: a subset of 108 SNPs were identified in Jansen et al GWAS, when analyses were run in the 23andMe separately; for excessive daytime sleepiness: a subset of 19 SNPs were identified in Wang H et al GWAS, when analyses were ran in 337,539 unrelated…	1SMRsensitivity1*, 1SMRsensitivity2*, and 1SMRsensitivity3* were collider corrected IVW, MR-Egger, and LADreg accounting for winner's curse: for insomnia: a subset of 108 SNPs were identified in Jansen et al GWAS, when analyses were run in the 23andMe separately; for excessive daytime sleepiness: a subset of 19 SNPs were identified in Wang H et al GWAS, when analyses were ran in 337,539 unrelated…	1SMRsensitivity1*, 1SMRsensitivity2*, and 1SMRsensitivity3* were collider corrected IVW, MR-Egger, and LADreg accounting for winner's curse: for insomnia: a subset of 108 SNPs were identified in Jansen et al GWAS, when analyses were run in the 23andMe separately; for excessive daytime sleepiness: a subset of 19 SNPs were identified in Wang H et al GWAS, when analyses were ran in 337,539 unrelated…	1SMRsensitivity1*, 1SMRsensitivity2*, and 1SMRsensitivity3* were collider corrected IVW, MR-Egger, and LADreg accounting for winner's curse: for insomnia: a subset of 108 SNPs were identified in Jansen et al GWAS, when analyses were run in the 23andMe separately; for excessive daytime sleepiness: a subset of 19 SNPs were identified in Wang H et al GWAS, when analyses were ran in 337,539 unrelated…	1SMRsensitivity1*, 1SMRsensitivity2*, and 1SMRsensitivity3* were collider corrected IVW, MR-Egger, and LADreg accounting for winner's curse: for insomnia: a subset of 108 SNPs were identified in Jansen et al GWAS, when analyses were run in the 23andMe separately; for excessive daytime sleepiness: a subset of 19 SNPs were identified in Wang H et al GWAS, when analyses were ran in 337,539 unrelated…	1SMRsensitivity1*, 1SMRsensitivity2*, and 1SMRsensitivity3* were collider corrected IVW, MR-Egger, and LADreg accounting for winner's curse: for insomnia: a subset of 108 SNPs were identified in Jansen et al GWAS, when analyses were run in the 23andMe separately; for excessive daytime sleepiness: a subset of 19 SNPs were identified in Wang H et al GWAS, when analyses were ran in 337,539 unrelated…	1SMRsensitivity1*, 1SMRsensitivity2*, and 1SMRsensitivity3* were collider corrected IVW, MR-Egger, and LADreg accounting for winner's curse: for insomnia: a subset of 108 SNPs were identified in Jansen et al GWAS, when analyses were run in the 23andMe separately; for excessive daytime sleepiness: a subset of 19 SNPs were identified in Wang H et al GWAS, when analyses were ran in 337,539 unrelated…	1SMRsensitivity1*, 1SMRsensitivity2*, and 1SMRsensitivity3* were collider corrected IVW, MR-Egger, and LADreg accounting for winner's curse: for insomnia: a subset of 108 SNPs were identified in Jansen et al GWAS, when analyses were run in the 23andMe separately; for excessive daytime sleepiness: a subset of 19 SNPs were identified in Wang H et al GWAS, when analyses were ran in 337,539 unrelated…	1SMRsensitivity1*, 1SMRsensitivity2*, and 1SMRsensitivity3* were collider corrected IVW, MR-Egger, and LADreg accounting for winner's curse: for insomnia: a subset of 108 SNPs were identified in Jansen et al GWAS, when analyses were run in the 23andMe separately; for excessive daytime sleepiness: a subset of 19 SNPs were identified in Wang H et al GWAS, when analyses were ran in 337,539 unrelated…	1SMRsensitivity1*, 1SMRsensitivity2*, and 1SMRsensitivity3* were collider corrected IVW, MR-Egger, and LADreg accounting for winner's curse: for insomnia: a subset of 108 SNPs were identified in Jansen et al GWAS, when analyses were run in the 23andMe separately; for excessive daytime sleepiness: a subset of 19 SNPs were identified in Wang H et al GWAS, when analyses were ran in 337,539 unrelated…	1SMRsensitivity1*, 1SMRsensitivity2*, and 1SMRsensitivity3* were collider corrected IVW, MR-Egger, and LADreg accounting for winner's curse: for insomnia: a subset of 108 SNPs were identified in Jansen et al GWAS, when analyses were run in the 23andMe separately; for excessive daytime sleepiness: a subset of 19 SNPs were identified in Wang H et al GWAS, when analyses were ran in 337,539 unrelated…	1SMRsensitivity1*, 1SMRsensitivity2*, and 1SMRsensitivity3* were collider corrected IVW, MR-Egger, and LADreg accounting for winner's curse: for insomnia: a subset of 108 SNPs were identified in Jansen et al GWAS, when analyses were run in the 23andMe separately; for excessive daytime sleepiness: a subset of 19 SNPs were identified in Wang H et al GWAS, when analyses were ran in 337,539 unrelated…	1SMRsensitivity1*, 1SMRsensitivity2*, and 1SMRsensitivity3* were collider corrected IVW, MR-Egger, and LADreg accounting for winner's curse: for insomnia: a subset of 108 SNPs were identified in Jansen et al GWAS, when analyses were run in the 23andMe separately; for excessive daytime sleepiness: a subset of 19 SNPs were identified in Wang H et al GWAS, when analyses were ran in 337,539 unrelated…	1SMRsensitivity1*, 1SMRsensitivity2*, and 1SMRsensitivity3* were collider corrected IVW, MR-Egger, and LADreg accounting for winner's curse: for insomnia: a subset of 108 SNPs were identified in Jansen et al GWAS, when analyses were run in the 23andMe separately; for excessive daytime sleepiness: a subset of 19 SNPs were identified in Wang H et al GWAS, when analyses were ran in 337,539 unrelated…	1SMRsensitivity1*, 1SMRsensitivity2*, and 1SMRsensitivity3* were collider corrected IVW, MR-Egger, and LADreg accounting for winner's curse: for insomnia: a subset of 108 SNPs were identified in Jansen et al GWAS, when analyses were run in the 23andMe separately; for excessive daytime sleepiness: a subset of 19 SNPs were identified in Wang H et al GWAS, when analyses were ran in 337,539 unrelated…	1SMRsensitivity1*, 1SMRsensitivity2*, and 1SMRsensitivity3* were collider corrected IVW, MR-Egger, and LADreg accounting for winner's curse: for insomnia: a subset of 108 SNPs were identified in Jansen et al GWAS, when analyses were run in the 23andMe separately; for excessive daytime sleepiness: a subset of 19 SNPs were identified in Wang H et al GWAS, when analyses were ran in 337,539 unrelated…	1SMRsensitivity1*, 1SMRsensitivity2*, and 1SMRsensitivity3* were collider corrected IVW, MR-Egger, and LADreg accounting for winner's curse: for insomnia: a subset of 108 SNPs were identified in Jansen et al GWAS, when analyses were run in the 23andMe separately; for excessive daytime sleepiness: a subset of 19 SNPs were identified in Wang H et al GWAS, when analyses were ran in 337,539 unrelated…	1SMRsensitivity1*, 1SMRsensitivity2*, and 1SMRsensitivity3* were collider corrected IVW, MR-Egger, and LADreg accounting for winner's curse: for insomnia: a subset of 108 SNPs were identified in Jansen et al GWAS, when analyses were run in the 23andMe separately; for excessive daytime sleepiness: a subset of 19 SNPs were identified in Wang H et al GWAS, when analyses were ran in 337,539 unrelated…	1SMRsensitivity1*, 1SMRsensitivity2*, and 1SMRsensitivity3* were collider corrected IVW, MR-Egger, and LADreg accounting for winner's curse: for insomnia: a subset of 108 SNPs were identified in Jansen et al GWAS, when analyses were run in the 23andMe separately; for excessive daytime sleepiness: a subset of 19 SNPs were identified in Wang H et al GWAS, when analyses were ran in 337,539 unrelated…	1SMRsensitivity1*, 1SMRsensitivity2*, and 1SMRsensitivity3* were collider corrected IVW, MR-Egger, and LADreg accounting for winner's curse: for insomnia: a subset of 108 SNPs were identified in Jansen et al GWAS, when analyses were run in the 23andMe separately; for excessive daytime sleepiness: a subset of 19 SNPs were identified in Wang H et al GWAS, when analyses were ran in 337,539 unrelated…	1SMRsensitivity1*, 1SMRsensitivity2*, and 1SMRsensitivity3* were collider corrected IVW, MR-Egger, and LADreg accounting for winner's curse: for insomnia: a subset of 108 SNPs were identified in Jansen et al GWAS, when analyses were run in the 23andMe separately; for excessive daytime sleepiness: a subset of 19 SNPs were identified in Wang H et al GWAS, when analyses were ran in 337,539 unrelated…	1SMRsensitivity1*, 1SMRsensitivity2*, and 1SMRsensitivity3* were collider corrected IVW, MR-Egger, and LADreg accounting for winner's curse: for insomnia: a subset of 108 SNPs were identified in Jansen et al GWAS, when analyses were run in the 23andMe separately; for excessive daytime sleepiness: a subset of 19 SNPs were identified in Wang H et al GWAS, when analyses were ran in 337,539 unrelated…	1SMRsensitivity1*, 1SMRsensitivity2*, and 1SMRsensitivity3* were collider corrected IVW, MR-Egger, and LADreg accounting for winner's curse: for insomnia: a subset of 108 SNPs were identified in Jansen et al GWAS, when analyses were run in the 23andMe separately; for excessive daytime sleepiness: a subset of 19 SNPs were identified in Wang H et al GWAS, when analyses were ran in 337,539 unrelated…	1SMRsensitivity1*, 1SMRsensitivity2*, and 1SMRsensitivity3* were collider corrected IVW, MR-Egger, and LADreg accounting for winner's curse: for insomnia: a subset of 108 SNPs were identified in Jansen et al GWAS, when analyses were run in the 23andMe separately; for excessive daytime sleepiness: a subset of 19 SNPs were identified in Wang H et al GWAS, when analyses were ran in 337,539 unrelated…	1SMRsensitivity1*, 1SMRsensitivity2*, and 1SMRsensitivity3* were collider corrected IVW, MR-Egger, and LADreg accounting for winner's curse: for insomnia: a subset of 108 SNPs were identified in Jansen et al GWAS, when analyses were run in the 23andMe separately; for excessive daytime sleepiness: a subset of 19 SNPs were identified in Wang H et al GWAS, when analyses were ran in 337,539 unrelated…	1SMRsensitivity1*, 1SMRsensitivity2*, and 1SMRsensitivity3* were collider corrected IVW, MR-Egger, and LADreg accounting for winner's curse: for insomnia: a subset of 108 SNPs were identified in Jansen et al GWAS, when analyses were run in the 23andMe separately; for excessive daytime sleepiness: a subset of 19 SNPs were identified in Wang H et al GWAS, when analyses were ran in 337,539 unrelated…	1SMRsensitivity1*, 1SMRsensitivity2*, and 1SMRsensitivity3* were collider corrected IVW, MR-Egger, and LADreg accounting for winner's curse: for insomnia: a subset of 108 SNPs were identified in Jansen et al GWAS, when analyses were run in the 23andMe separately; for excessive daytime sleepiness: a subset of 19 SNPs were identified in Wang H et al GWAS, when analyses were ran in 337,539 unrelated…	1SMRsensitivity1*, 1SMRsensitivity2*, and 1SMRsensitivity3* were collider corrected IVW, MR-Egger, and LADreg accounting for winner's curse: for insomnia: a subset of 108 SNPs were identified in Jansen et al GWAS, when analyses were run in the 23andMe separately; for excessive daytime sleepiness: a subset of 19 SNPs were identified in Wang H et al GWAS, when analyses were ran in 337,539 unrelated…	1SMRsensitivity1*, 1SMRsensitivity2*, and 1SMRsensitivity3* were collider corrected IVW, MR-Egger, and LADreg accounting for winner's curse: for insomnia: a subset of 108 SNPs were identified in Jansen et al GWAS, when analyses were run in the 23andMe separately; for excessive daytime sleepiness: a subset of 19 SNPs were identified in Wang H et al GWAS, when analyses were ran in 337,539 unrelated…	1SMRsensitivity1*, 1SMRsensitivity2*, and 1SMRsensitivity3* were collider corrected IVW, MR-Egger, and LADreg accounting for winner's curse: for insomnia: a subset of 108 SNPs were identified in Jansen et al GWAS, when analyses were run in the 23andMe separately; for excessive daytime sleepiness: a subset of 19 SNPs were identified in Wang H et al GWAS, when analyses were ran in 337,539 unrelated…	1SMRsensitivity1*, 1SMRsensitivity2*, and 1SMRsensitivity3* were collider corrected IVW, MR-Egger, and LADreg accounting for winner's curse: for insomnia: a subset of 108 SNPs were identified in Jansen et al GWAS, when analyses were run in the 23andMe separately; for excessive daytime sleepiness: a subset of 19 SNPs were identified in Wang H et al GWAS, when analyses were ran in 337,539 unrelated…	1SMRsensitivity1*, 1SMRsensitivity2*, and 1SMRsensitivity3* were collider corrected IVW, MR-Egger, and LADreg accounting for winner's curse: for insomnia: a subset of 108 SNPs were identified in Jansen et al GWAS, when analyses were run in the 23andMe separately; for excessive daytime sleepiness: a subset of 19 SNPs were identified in Wang H et al GWAS, when analyses were ran in 337,539 unrelated…	1SMRsensitivity1*, 1SMRsensitivity2*, and 1SMRsensitivity3* were collider corrected IVW, MR-Egger, and LADreg accounting for winner's curse: for insomnia: a subset of 108 SNPs were identified in Jansen et al GWAS, when analyses were run in the 23andMe separately; for excessive daytime sleepiness: a subset of 19 SNPs were identified in Wang H et al GWAS, when analyses were ran in 337,539 unrelated…	1SMRsensitivity1*, 1SMRsensitivity2*, and 1SMRsensitivity3* were collider corrected IVW, MR-Egger, and LADreg accounting for winner's curse: for insomnia: a subset of 108 SNPs were identified in Jansen et al GWAS, when analyses were run in the 23andMe separately; for excessive daytime sleepiness: a subset of 19 SNPs were identified in Wang H et al GWAS, when analyses were ran in 337,539 unrelated…	1SMRsensitivity1*, 1SMRsensitivity2*, and 1SMRsensitivity3* were collider corrected IVW, MR-Egger, and LADreg accounting for winner's curse: for insomnia: a subset of 108 SNPs were identified in Jansen et al GWAS, when analyses were run in the 23andMe separately; for excessive daytime sleepiness: a subset of 19 SNPs were identified in Wang H et al GWAS, when analyses were ran in 337,539 unrelated…	1SMRsensitivity1*, 1SMRsensitivity2*, and 1SMRsensitivity3* were collider corrected IVW, MR-Egger, and LADreg accounting for winner's curse: for insomnia: a subset of 108 SNPs were identified in Jansen et al GWAS, when analyses were run in the 23andMe separately; for excessive daytime sleepiness: a subset of 19 SNPs were identified in Wang H et al GWAS, when analyses were ran in 337,539 unrelated…	1SMRsensitivity1*, 1SMRsensitivity2*, and 1SMRsensitivity3* were collider corrected IVW, MR-Egger, and LADreg accounting for winner's curse: for insomnia: a subset of 108 SNPs were identified in Jansen et al GWAS, when analyses were run in the 23andMe separately; for excessive daytime sleepiness: a subset of 19 SNPs were identified in Wang H et al GWAS, when analyses were ran in 337,539 unrelated…	1SMRsensitivity1*, 1SMRsensitivity2*, and 1SMRsensitivity3* were collider corrected IVW, MR-Egger, and LADreg accounting for winner's curse: for insomnia: a subset of 108 SNPs were identified in Jansen et al GWAS, when analyses were run in the 23andMe separately; for excessive daytime sleepiness: a subset of 19 SNPs were identified in Wang H et al GWAS, when analyses were ran in 337,539 unrelated…	1SMRsensitivity1*, 1SMRsensitivity2*, and 1SMRsensitivity3* were collider corrected IVW, MR-Egger, and LADreg accounting for winner's curse: for insomnia: a subset of 108 SNPs were identified in Jansen et al GWAS, when analyses were run in the 23andMe separately; for excessive daytime sleepiness: a subset of 19 SNPs were identified in Wang H et al GWAS, when analyses were ran in 337,539 unrelated…	1SMRsensitivity1*, 1SMRsensitivity2*, and 1SMRsensitivity3* were collider corrected IVW, MR-Egger, and LADreg accounting for winner's curse: for insomnia: a subset of 108 SNPs were identified in Jansen et al GWAS, when analyses were run in the 23andMe separately; for excessive daytime sleepiness: a subset of 19 SNPs were identified in Wang H et al GWAS, when analyses were ran in 337,539 unrelated…	1SMRsensitivity1*, 1SMRsensitivity2*, and 1SMRsensitivity3* were collider corrected IVW, MR-Egger, and LADreg accounting for winner's curse: for insomnia: a subset of 108 SNPs were identified in Jansen et al GWAS, when analyses were run in the 23andMe separately; for excessive daytime sleepiness: a subset of 19 SNPs were identified in Wang H et al GWAS, when analyses were ran in 337,539 unrelated…	1SMRsensitivity1*, 1SMRsensitivity2*, and 1SMRsensitivity3* were collider corrected IVW, MR-Egger, and LADreg accounting for winner's curse: for insomnia: a subset of 108 SNPs were identified in Jansen et al GWAS, when analyses were run in the 23andMe separately; for excessive daytime sleepiness: a subset of 19 SNPs were identified in Wang H et al GWAS, when analyses were ran in 337,539 unrelated…
Sagarn test p-value / F-statistics / IGX2†: In the row of "1SMRmain" , the value indicates Sagarn test p-value; in the rows of "1SMRsensitivity1" and "1SMRsensitivity1*", the value indicates F statistics; in the rows of "1SMRsensitivity2" and "1SMRsensitivity2*", the front value indicates IGX2 and the following value indicates p-value for MR-Egger intercept term.
‡ For the 2SMR estimates of the binary exposures (i.e., insomnia trait, short sleep, long sleep), we converted the results of the SNP-binary sleep trait from the multiplicative log odds scale to a difference in risk scale by beta = log-odds * u * (1-u), sebeta = selog-odds * u * (1-u), where u = Ncase / (Ncase + Ncontrol).
[truncated: 5,000 more columns]

## Sheet: ST6
Supplementary Table 6: One-sample and two-sample Mendelian randomization analysis to assess the effects of HbA1c on insomnia symptoms
Design	Exposure (unit)	Method	F-statistic and R2 of instrumental variable of HbA1c	Outcome: insomnia symptoms (usually experiencing insomnia symptoms vs sometimes, rarely/never)
				N	OR	LCI	UCI	p-value	Intercept p-value
1SMR	HbA1c (log mmol/mol)	2SLS	6,160 (1.9%)*	320852	1.03074	0.697116	1.52404	0.879382	-
2SMR	HbA1c (%)	IVW	128 (3%)†	-	0.952742	0.869537	1.04391	0.299119	-
		WM		-	0.957585	0.850242	1.07848	0.474925	-
		MR-Egger		-	0.802172	0.640425	1.00477	0.0872553	0.135811
The 1SMR*, the unweighted allele score is generated from 11 SNPs in the UK Biobank, which has the coefficient (SE) as 0.0105 (0.00013) (log HbA1c (log mmol/mol) per unit allele score increase). The F-statistic is calculated via ANOVA adjusted for sex, age, assessment centre, chip, 40 genetic principal components in the UK Biobank; the R2 = K*F/(N-K-1+K*F), where K=1, N = 321,076).
In 2SMR† , we obtained individual R2i via R2i = K*Fi/(Ni-K-1+K*Fi), where K=1, Fi = BetaXGi^2 / seBetaXGi^2 (i.e., the individual F statistic, BetaXGi and seBetaXGi were obtained from the discovery GWAS), and Ni is the SNP-exposure sample size of each SNP. We sum these individuals R2i to get the total R2, which is equal to 3%. Accordingly, the F-statistic (128) was calculated via F = (N-K-1)/K * …
1SMR: one-sample Mendelian randomization, 2SLS: two stage least square, IVW: inverse-variance weighted, WM: weighted median; SNP: single-nucleotide polymorphism.

## Sheet: ST7
Supplementary Table 7: Instrument strength of the unweighted allele scores in the UK Biobank and instrument strength of individual genetic variants in the discovery genome-wide association studies and the UK Biobank
SNP: single-nucleotide polymorphism; NA: not available
* F-statistics of individual SNPs = BetaXG^2 / seBetaXG^2. In 1SMR (i.e., collider corrected estimates in the UK Biobank): BetaXG and seBetaXG were obtained from a linear regression model with adjustment for sex, age, assessment centre, chip, 40 genetic principal components; in 2SMR applying to the MAGIC: BetaXG and seBetaXG were obtained from the discovery GWAS .
† R2 of individual SNP = K*F/(N-K-1+K*F), K=1. In 1SMR (i.e., collider corrected estimates in the UK Biobank): N is the sample size in the UK Biobank, F is the corresponding individual F statistic obtained from the UK Biobank; in 2SMR applying to the MAGIC: N is the sample size in the discovery GWAS, F is the corresponding individual F statistic obtained from the discovery GWAS.
‡ SNP (rsid): for napping SNPs with ‡ indicating the summary statistics of this SNP is obtained from UKB only with n= 452,633; for chronotype SNPs with ‡ indicating the summary statistics of this SNP is obtained from 23andMe only with n=248,094
Sleep traits		Insomnia symptoms					24-hour sleep duration					Short sleep duration (<=6 hours vs 7-8 hours)					Long sleep duration (>=9 hours vs 7-8 hours)					Daytime sleepiness					Daytime napping					Chronotype (evening preference)
F-statistic of the unweighted allele score in the UK Biobank		2056					1995					665					181					1050					3194					7359
Instrument strength of Individual genetic variant in the UK Biobank and discovery GWAS	N	SNP (rsid)	UK Biobank (n=336,766)		Discovery GWAS (n=1,331,010)		SNP (rsid)	UK Biobank (n=335,198)		Discovery GWAS (n=446,118)		SNP (rsid)	UK Biobank (n=309,510)		Discovery GWAS (n=411,934)		SNP (rsid)	UK Biobank (n=255,764)		Discovery GWAS (n=339,926)		SNP (rsid)	UK Biobank (n=335,852)		Discovery GWAS (n=452,071)		SNP (rsid)	UK Biobank (n=336,872)		Discovery GWAS (n=993,966)		SNP (rsid)	UK Biobank (n=335,976)		Discovery GWAS (n=697,828)
			F-statistics of individual SNP*	R2 of individual SNP†	F-statistics of individual SNP*	R2 of individual SNP†		F-statistics of individual SNP*	R2 of individual SNP†	F-statistics of individual SNP*	R2 of individual SNP†		F-statistics of individual SNP*	R2 of individual SNP†	F-statistics of individual SNP*	R2 of individual SNP†		F-statistics of individual SNP*	R2 of individual SNP†	F-statistics of individual SNP*	R2 of individual SNP†		F-statistics of individual SNP*	R2 of individual SNP†	F-statistics of individual SNP*	R2 of individual SNP†		F-statistics of individual SNP*	R2 of individual SNP†	F-statistics of individual SNP*	R2 of individual SNP†		F-statistics of individual SNP*	R2 of individual SNP†	F-statistics of individual SNP*	R2 of individual SNP†
		Mean F statistics and Sum R2	8.00927	0.00582659	41.3991	0.0077134	Mean F statistics and Sum R2	26.4247	0.00606952	39.6114	0.00692494	Mean F statistics and Sum R2	23.8098	0.00207687	25.3406	0.00166083	Mean F statistics and Sum R2	26.926	0.000736858	40.006	0.000941412	Mean F statistics and Sum R2	28.1186	0.00309744	42.4508	0.00347405	Mean F statistics and Sum R2	30.9641	0.0104771	59.7336	0.00807185	Mean F statistics and Sum R2	22.8481	0.0231876	56.9873	0.0286475
	1	rs113851554	59.0115	0.0001752	216.933	0.000162957	rs7556815	153.695	0.000458312	221.901	0.000497159	rs2863957	53.9016	0.000174122	54.7317	0.000132848	rs6737318	36.0172	0.000140803	56.1051	0.000165025	rs2787120	33.5121	9.9773e-05	31.9288	7.06231e-05	rs11615756	151.436	0.000449336	361	0.00036306	rs10058356	34.038	0.000101301	39.5012	5.66029e-05
	2	rs62149809	18.3551	5.45013e-05	34.8372	2.61728e-05	rs75539574	45.8289	0.000136704	79.4582	0.000178079	rs13107325	37.4156	0.000120873	46.4587	0.00011277	rs75458655	33.719	0.00013182	50.1607	0.000147543	rs12140153	65.3783	0.000194627	85.1859	0.0001884	rs385199	143.224	0.00042498	342.25	0.00034421	rs10237162	35.0253	0.000104239	84.401	0.000120934
	3	rs1064939	10.4348	3.09846e-05	42.348	3.18155e-05	rs12607679	38.387	0.000114508	59.9632	0.000134394	rs1229762	19.3669	6.25693e-05	33.1097	8.03703e-05	rs17688916	37.2776	0.00014573	48.6372	0.000143062	rs17131124	20.6053	6.13489e-05	37.0268	8.18984e-05	rs2653349	99.2561	0.000294555	214.223	0.000215478	rs1025601	19.6144	5.83773e-05	33.9772	4.86878e-05
	4	rs79204944	0.0391846	1.16356e-07	31.6898	2.38083e-05	rs915416	33.0621	9.86255e-05	59.3927	0.000133115	rs1380703	27.2927	8.81732e-05	34.6697	8.41566e-05	rs17817288	20.9797	8.20216e-05	34.4453	0.000101322	rs57746981	21.4524	6.38708e-05	40.0679	8.86244e-05	rs9965170	82.972	0.000246242	177.778	0.000178825	rs10520176	64.8199	0.000192894	112.487	0.000161171
	5	rs72899452	2.79575	8.30174e-06	38.2124	2.87085e-05	rs9940646	37.5026	0.00011187	55.1062	0.000123509	rs12963463	21.5941	6.97642e-05	19.9865	4.85165e-05	rs3751046	18.7411	7.327e-05	32.7508	9.63381e-05	rs825127	15.3724	4.57696e-05	32.7808	7.25076e-05	rs2250377	76.8311	0.000228021	180.753	0.000181818	rs1061032	45.5094	0.000135437	109.621	0.000157065
	6	rs55972276	16.3573	4.85696e-05	66.2423	4.97661e-05	rs13109404	31.6112	9.42977e-05	50.281	0.000112696	rs75539574	12.9074	4.17013e-05	17.2163	4.17923e-05	rs7534398	18.9324	7.40182e-05	32.6489	9.60383e-05	rs4665972	30.5012	9.08096e-05	39.1652	8.66278e-05	rs2431108	72.5804	0.000215409	263.16	0.000264688	rs10742179	17.0369	5.07064e-05	68.145	9.76438e-05
	7	rs138014720	2.86589	8.51001e-06	28.6028	2.14891e-05	rs8050478	25.9999	7.75601e-05	49.827	0.000111678	rs17388803	26.7646	8.64673e-05	29.4021	7.1371e-05	rs10899257	22.8147	8.91947e-05	31.0137	9.12288e-05	rs7598712	21.7943	6.48887e-05	30.9227	6.83979e-05	rs13284688	52.7703	0.000156624	181.025	0.000182091	rs10818834	25.0872	7.46644e-05	52.5045	7.52345e-05
	8	rs2286729	0.947787	2.81439e-06	39.9494	3.00135e-05	rs56372231	35.9528	0.000107247	49.8789	0.000111795	rs4585442	26.6962	8.62462e-05	26.9346	6.53818e-05	rs549961083	NA	NA	34.2866	0.000100855	rs6741951	17.0945	5.08965e-05	35.6826	7.89255e-05	rs614987‡	60.403	0.000179275	84.0278	0.000185609	rs10830107	16.8419	5.01261e-05	37.7487	5.40918e-05
	9	rs118166957	6.71393	1.99362e-05	71.5264	5.37357e-05	rs13088093	17.4427	5.20345e-05	45.9383	0.000102963	rs1607227	21.4492	6.92962e-05	22.9277	5.56559e-05						rs11123962	37.1909	0.000110724	60.4799	0.000133767	rs10875622	36.9298	0.000109614	100	0.000100597	rs10832648	22.8828	6.81042e-05	51.538	7.38497e-05
	10	rs11650304	10.2178	3.03401e-05	30.917	2.32277e-05	rs2079070	23.7855	7.09549e-05	46.7536	0.000104791	rs2820313	27.2567	8.80569e-05	26.9346	6.53818e-05						rs9712275	18.4484	5.49274e-05	32.5145	7.19186e-05	rs796858289‡	57.2897	0.000170036	76.5625	0.000169121	rs10838687	15.7703	4.69368e-05	59.4441	8.51775e-05
	11	rs62158170	10.8276	3.2151e-05	88.3271	6.63566e-05	rs34556183	25.5791	7.6305e-05	45.1833	0.000101271	rs17005118	20.631	6.66529e-05	21.4305	5.20216e-05						rs7607363	21.0106	6.25556e-05	33.6581	7.4448e-05	rs6919087	47.009	0.000139527	81	8.14852e-05	rs10917513	33.743	0.000100423	68.2937	9.78568e-05
	12	rs62264767	18.114	5.37854e-05	65.7133	4.93686e-05	rs3095508	32.5158	9.69959e-05	44.5411	9.9832e-05	rs5757675	19.5536	6.31725e-05	23.9434	5.81214e-05						rs13010456	55.3513	0.000164782	54.2287	0.000119942	rs174541	38.471	0.000114188	102.235	0.000102845	rs10951325	31.3454	9.32884e-05	91.2789	0.000130788
	13	rs7168238	16.7397	4.97052e-05	33.7596	2.53633e-05	rs34731055	19.9207	5.94264e-05	43.5451	9.75998e-05	rs12567114	26.4691	8.55125e-05	31.2835	7.59375e-05						rs13097760	14.1128	4.20194e-05	30.8641	6.82684e-05	rs2195272	35.1256	0.00010426	60.4938	6.08575e-05	rs10988239	35.1637	0.000104651	48.3581	6.92935e-05
	14	rs699844	1.61967	4.80949e-06	29.9049	2.24674e-05	rs73219758	23.5838	7.03533e-05	43.0336	9.64535e-05	rs142180737	26.5698	8.58378e-05	23.8108	5.77993e-05						rs34478464	10.98	3.2692e-05	43.3084	9.57911e-05	rs2861805	49.5569	0.000147088	109.086	0.000109737	rs11165655	23.7294	7.06238e-05	57.4412	8.23078e-05
	15	rs7566062	0.811452	2.40955e-06	71.5519	5.37548e-05	rs10973207	40.8148	0.000121749	42.9831	9.63403e-05	rs2186122	21.3944	6.91193e-05	15.9242	3.86559e-05						rs960986	20.9653	6.24206e-05	44.9503	9.94226e-05	rs13033444	49.5865	0.000147176	79.21	7.96847e-05	rs111867612	10.7212	3.19099e-05	32.982	4.72618e-05
	16	rs28611339	21.5064	6.38578e-05	41.9169	3.14916e-05	rs2139261	28.2925	8.43986e-05	41.5803	9.31964e-05	rs11763750	15.7957	5.10323e-05	19.4257	4.71553e-05						rs843372	25.4455	7.57588e-05	44.3417	9.80765e-05	rs11258652	36.4398	0.00010816	98.01	9.85955e-05	rs11200159	16.4141	4.8853e-05	37.9579	5.43916e-05
	17	rs1015438	16.8614	5.00665e-05	53.051	3.98562e-05	rs4592416	33.2421	9.91621e-05	41.9637	9.40557e-05	rs12518468	13.6517	4.41059e-05	22.9725	5.57646e-05						rs11942333	20.8255	6.20044e-05	30.1056	6.65906e-05	rs1592544	35.6621	0.000105852	64	6.43845e-05	rs11208844	15.9498	4.7471e-05	37.4055	5.36e-05
	18	rs6465151	19.1752	5.69363e-05	39.2437	2.94833e-05	rs365663	34.6271	0.000103293	41.0722	9.20577e-05	rs9367621	25.5604	8.25773e-05	18.9698	4.60487e-05						rs13135092	15.36	4.57326e-05	30.277	6.69697e-05	rs12451365	31.6231	9.38644e-05	92.8595	9.34147e-05	rs112201801	3.99881	1.1902e-05	45.7234	NA
	19	rs2815757	1.54685	4.59325e-06	48.0157	3.60734e-05	rs1517572	28.5986	8.53118e-05	40.5714	9.09353e-05	rs3776864	21.367	6.90305e-05	22.9725	5.57646e-05						rs6897863	26.4974	7.88903e-05	38.0123	8.40781e-05	rs542011541	39.4063	0.000116964	77.44	7.79042e-05	rs113851554	25.6435	7.63201e-05	59.722	8.55756e-05
	20	rs16903122	10.3248	3.06579e-05	62.7144	4.71158e-05	rs7915425	36.6644	0.00010937	40.8457	9.155e-05	rs60882754	11.4865	3.71106e-05	20.283	4.92364e-05						rs12153518	24.7195	7.35973e-05	42.2132	9.33691e-05	rs749865489‡	36.9427	0.000109652	50.1736	0.000110837	rs1144566	137.14	0.000408021	471.889	0.00067577
	21	rs2792990	3.7596	1.11638e-05	46.39	3.48521e-05	rs330088	26.2768	7.83863e-05	40.1419	8.99728e-05	rs59779556	16.335	5.27746e-05	17.3128	4.20266e-05						rs6923811	25.5367	7.60301e-05	37.5686	8.30968e-05	rs10149986	36.4684	0.000108245	61.124	6.14914e-05	rs11545787	42.9119	0.000127708	142.755	0.000204529
	22	rs34490907	6.98502	2.07412e-05	35.3903	2.65884e-05	rs8038326	26.7293	7.97359e-05	39.4748	8.84776e-05	rs2014830	16.6368	5.37496e-05	21.4305	5.20216e-05						rs55960940	19.5835	5.83068e-05	31.8382	7.04229e-05	rs2786547	39.4178	0.000116998	62.5537	6.29296e-05	rs11588913	17.6586	5.25567e-05	43.56	6.24185e-05
	23	rs670501	1.79317	5.32467e-06	56.4483	4.24084e-05	rs460692	15.7431	4.69648e-05	39.8792	8.93841e-05	rs205024	34.2393	0.000110613	22.9277	5.56559e-05						rs3122170	54.3496	0.000161801	60.001	0.000132708	rs11125776	36.0455	0.00010699	43.3403	4.36016e-05	rs11597421	18.8108	5.59856e-05	34.8454	4.99317e-05
	24	rs1927902	1.78585	5.30295e-06	56.4483	4.24084e-05	rs9382445	26.3516	7.86094e-05	38.7951	8.69544e-05	rs12661667	18.9857	6.13378e-05	18.5954	4.514e-05						rs62519825	24.7865	7.3797e-05	33.8921	7.49654e-05	rs350785	25.4052	7.54099e-05	66.4852	6.68845e-05	rs11611435	30.9994	9.22587e-05	46.8266	6.70991e-05
	25	rs1620977	1.7812	5.28914e-06	54.4291	4.08914e-05	rs4767550	27.9975	8.35187e-05	38.1018	8.54004e-05	rs7939345	24.4708	7.90574e-05	22.1238	5.37044e-05						rs285793	31.0034	9.23048e-05	42.6847	9.44119e-05	rs2769916	26.4387	7.84771e-05	87.1111	8.76324e-05	rs1163238	19.9447	5.93603e-05	33.4315	4.79058e-05
	26	rs75452188	2.7772	8.24665e-06	32.9262	2.47372e-05	rs11885663	29.2578	8.72781e-05	38.4084	8.60877e-05	rs9321171	27.606	8.91852e-05	26.9872	6.55094e-05						rs7837226	25.1854	7.49843e-05	30.9163	6.83838e-05	rs1601440‡	16.4072	4.87024e-05	42.25	9.33344e-05	rs11670534	14.6973	4.37433e-05	42.302	6.0616e-05
	27	rs71575448	3.99615	1.18662e-05	31.7258	2.38354e-05	rs1991556	33.2709	9.92482e-05	37.1875	8.33515e-05	rs7524118	27.4655	8.87312e-05	21.4305	5.20216e-05						rs55818482	43.4305	0.000129298	59.7015	0.000132045	rs17158413	32.4792	9.64055e-05	54.76	5.50895e-05	rs11788633	4.88585	1.45421e-05	36.8085	5.27446e-05
	28	rs11756035	6.95228	2.06439e-05	31.7258	2.38354e-05	rs1057703	20.0009	5.96658e-05	36.7539	8.23796e-05											rs1566362	26.5811	7.91396e-05	34.9714	7.73525e-05	rs35011311	5.75282	1.7077e-05	59.29	5.96465e-05	rs12065331	19.7991	5.89269e-05	49.6743	7.11793e-05
	29	rs62429521	6.44554	1.91393e-05	40.153	3.01664e-05	rs4128364	25.8698	7.71721e-05	37.5263	8.41108e-05											rs7476897	26.5876	7.91588e-05	45.4659	0.000100563	rs3935190	38.9164	0.00011551	64	6.43845e-05	rs12140153	52.6661	0.000156732	86.5458	0.000124007
	30	rs7992992	0.808342	2.40032e-06	31.7258	2.38354e-05	rs61796569	16.2047	4.83416e-05	36.2341	8.12148e-05											rs4765939	16.4724	4.90445e-05	36.0116	7.96531e-05	rs962247	37.7318	0.000111994	62.2346	6.26086e-05	rs1221502	17.3076	5.1512e-05	35.4144	5.0747e-05
	31	rs908668	14.8188	4.40015e-05	50.4954	3.79363e-05	rs10483350	26.0391	7.76771e-05	36.7011	8.22612e-05											rs1846644	78.124	0.000232562	117.439	0.000259713	rs60222088	32.2177	9.56293e-05	58.7778	5.91312e-05	rs12249410	21.418	6.37451e-05	39.0125	5.59027e-05
	32	rs2491124	7.46086	2.21541e-05	66.1244	4.96775e-05	rs7115226	22.332	6.66194e-05	37.2989	8.3601e-05											rs8015449	16.7776	4.99533e-05	35.8126	7.9213e-05	rs13150944‡	18.6912	5.54818e-05	43.7633	9.66772e-05	rs12298405	24.4069	7.26398e-05	44.823	6.42282e-05
	33	rs35322724	11.8182	3.50922e-05	66.1244	4.96775e-05	rs269054	36.4158	0.000108628	35.2216	7.89455e-05											rs17356118	31.4432	9.3614e-05	39.3205	8.69713e-05	rs35039375	32.776	9.72862e-05	61.8844	6.22564e-05	rs12378543	17.096	5.08822e-05	37.6628	5.39687e-05
	34	rs62068188	6.81861	2.0247e-05	37.195	2.79442e-05	rs112230981	24.9172	7.43306e-05	36.3064	8.13767e-05											rs886114	13.2385	3.94164e-05	31.6396	6.99835e-05	rs4236060	32.9693	9.78599e-05	40.96	4.1207e-05	rs12436039	7.11027	2.11627e-05	33.7096	4.83043e-05
	35	rs9931543	4.68524	1.39123e-05	46.7022	3.50866e-05	rs11602180	21.9684	6.55348e-05	35.4154	7.93799e-05											rs11078398	33.3781	9.93742e-05	38.0886	8.42469e-05	rs80163246	29.4652	8.746e-05	58.4133	5.87645e-05	rs12442674	7.34478	2.18607e-05	36.5541	5.23801e-05
	36	rs3902952	6.21443	1.8453e-05	35.7564	2.68634e-05	rs2192528	23.6388	7.05173e-05	34.7753	7.79452e-05											rs62066119	32.0803	9.55105e-05	46.9474	0.000103839	rs224111	27.3756	8.12578e-05	67.6049	6.80109e-05	rs12445235	18.8764	5.6181e-05	35.4025	5.073e-05
	37	rs4790076	7.22567	2.14557e-05	35.7564	2.68634e-05	rs12246842	19.8393	5.91836e-05	34.949	7.83344e-05											rs2048522	25.2107	7.50597e-05	30.6666	6.78315e-05	rs1001817	23.8189	7.07016e-05	107.641	0.000108283	rs12518401	16.1166	4.79675e-05	44.957	6.44203e-05
	38	rs45453598	2.54989	7.57169e-06	34.3449	2.5803e-05	rs205024	28.5483	8.51617e-05	35.148	7.87804e-05																rs10835420	26.5911	7.89296e-05	38.44	3.86719e-05	rs12631477	13.8336	4.1173e-05	38.5144	5.5189e-05
	39	rs17223714	9.57297	2.84255e-05	43.0503	3.23431e-05	rs12567114	20.1871	6.02212e-05	34.2841	7.68443e-05																rs2370926	26.9221	7.9912e-05	38.716	3.89496e-05	rs12771973	13.7521	4.09305e-05	34.4334	4.93414e-05
	40	rs9316619	15.9504	4.73614e-05	32.9604	2.47629e-05	rs7616632	11.5438	3.44379e-05	33.9135	7.60137e-05																rs1883048	23.0946	6.85516e-05	40.1111	4.03531e-05	rs1278402	5.19332	1.54573e-05	39.125	5.60639e-05
	41	rs429358	9.70477	2.88169e-05	32.9604	2.47629e-05	rs6575005	21.3325	6.36377e-05	34.5064	7.73425e-05																rs12657723	32.5046	9.64806e-05	26.1235	2.62814e-05	rs12808544	32.841	9.77391e-05	68.3433	9.79278e-05
	42	rs12310246	14.7644	4.38401e-05	41.2776	3.10113e-05	rs11621908	29.1526	8.69642e-05	33.4547	7.49853e-05																rs6452787‡	34.6391	0.000102816	41.1736	9.09568e-05	rs12927162	70.3107	0.000209231	182.358	0.000261255
	43	rs830716	11.9336	3.54349e-05	41.2776	3.10113e-05	rs10421649	20.7926	6.20273e-05	33.4386	7.49492e-05																rs2099810	32.3332	9.5972e-05	41.5309	4.17813e-05	rs12950382	20.8747	6.21281e-05	32.7756	4.6966e-05
	44	rs67501351	13.7506	4.083e-05	41.2776	3.10113e-05	rs2072727	24.8903	7.42504e-05	33.6739	7.54766e-05																rs4983329	25.7136	7.63251e-05	58.7778	5.91312e-05	rs13004345	23.1181	6.88045e-05	39.3129	5.63331e-05
	45	rs34214423	5.28525	1.5694e-05	31.6032	2.37432e-05	rs113113059	16.2524	4.84839e-05	34.8388	7.80875e-05																rs17049683	11.279	3.34807e-05	38.716	3.89496e-05	rs13065394	26.4974	7.88612e-05	47.831	6.85382e-05
	46	rs12614369	3.5113	1.04265e-05	30.2732	2.27441e-05	rs374153	16.9444	5.05481e-05	32.2942	7.23844e-05																rs9998136	50.8818	0.00015102	67.24	6.76437e-05	rs13172141	6.74458	2.00743e-05	39.7152	5.69095e-05
	47	rs116466468	17.2934	5.1349e-05	39.5405	2.97063e-05	rs151014368	18.2502	5.44433e-05	32.6724	7.32321e-05																rs60920123	23.4005	6.94595e-05	33.3827	3.35843e-05	rs13203140	9.91266	2.95034e-05	39.9803	5.72894e-05
	48	rs2903385	5.67178	1.68417e-05	51.5033	3.86935e-05	rs62120041	34.7823	0.000103756	32.7067	7.3309e-05																rs1931175	20.7252	6.15192e-05	47.4568	4.77427e-05	rs13377754	18.5193	5.51182e-05	193.739	0.000277555
	49	rs6606731	7.5491	2.24161e-05	28.9706	2.17655e-05	rs7503199	28.0057	8.35432e-05	33.0252	7.40227e-05																rs285815	29.3432	8.70978e-05	42.9753	4.32344e-05	rs139911	55.3821	0.000164813	85.0269	0.000121831
	50	rs742760	0.0214496	6.36933e-08	28.9706	2.17655e-05	rs1939455	20.9306	6.24389e-05	32.8211	7.35654e-05																rs271057	33.028	9.80343e-05	72.25	7.26835e-05	rs1468945	37.1215	0.000110477	71.9443	0.000103087
	51	rs10800992	15.3038	4.54417e-05	49.2364	3.69904e-05	rs7951019	24.9291	7.43663e-05	32.0339	7.1801e-05																rs351776	20.0537	5.95261e-05	44.4444	4.47123e-05	rs149611468	24.4046	7.26332e-05	66.847	9.5784e-05
	52	rs55772859	8.97049	2.66366e-05	49.2364	3.69904e-05	rs17732997	17.0504	5.08645e-05	32.0835	7.19123e-05																rs10257273	28.3411	8.41235e-05	50.1736	5.04758e-05	rs1502249	14.8667	4.42477e-05	33.9423	4.86377e-05
	53	rs10865954	5.22978	1.55293e-05	49.2364	3.69904e-05	rs61985058	13.9838	4.17164e-05	33.0921	7.41728e-05																rs9389556	28.0058	8.31284e-05	38.44	3.86719e-05	rs1508608	14.4957	4.31435e-05	56.235	8.05795e-05
	54	rs17005118	16.9771	5.04099e-05	36.1737	2.71769e-05	rs17427571	21.4077	6.38623e-05	32.3184	7.24388e-05																rs113960908	30.9162	9.17663e-05	45.2562	4.5529e-05	rs16939162	37.2465	0.000110849	65.3511	9.36407e-05
	55	rs35539975	9.80437	2.91126e-05	36.1737	2.71769e-05	rs7806045	28.4397	8.48378e-05	31.5161	7.06406e-05																rs1415218	33.8467	0.000100464	37.21	3.74346e-05	rs17007397	10.1329	3.0159e-05	32.7527	4.69332e-05
	56	rs12666306	2.22435	6.60504e-06	49.2364	3.69904e-05	rs35531607	19.9883	5.9628e-05	32.0556	7.18496e-05																rs2417268	28.0086	8.31366e-05	32.1111	3.23051e-05	rs17140201	10.1486	3.02055e-05	36.072	5.16893e-05
	57	rs2867690	5.61779	1.66814e-05	27.6955	2.08074e-05	rs7644809	13.6854	4.08262e-05	32.2756	7.23427e-05																rs34262487	31.9877	9.49466e-05	26.7958	2.69578e-05	rs17302081	23.3811	6.95872e-05	36.4937	5.22935e-05
	58	rs12030482	1.19226	3.54034e-06	34.5441	2.59526e-05	rs9345234	13.8209	4.12307e-05	32.029	7.17902e-05																rs971415	29.2899	8.69395e-05	56.8284	5.71702e-05	rs1737893	13.1819	3.92333e-05	46.0498	6.5986e-05
	59	rs17025198	15.8672	4.71145e-05	34.5441	2.59526e-05	rs12791153	36.8583	0.000109948	31.192	6.99142e-05																rs77154532	29.2377	8.67846e-05	47.4568	4.77427e-05	rs17455138	6.20797	1.84772e-05	45.86	6.5714e-05
	60	rs56133505	5.26512	1.56342e-05	47.0183	3.53241e-05	rs1263056	24.6877	7.36461e-05	31.4254	7.04373e-05																rs11967137	25.7174	7.63365e-05	74.5868	7.50341e-05	rs17575798	21.9644	6.53711e-05	62.996	9.02664e-05
	61	rs7486418	6.07275	1.80323e-05	47.0183	3.53241e-05	rs55658675	21.257	6.34127e-05	30.7947	6.90237e-05																rs17265513	24.0401	7.13579e-05	55.5702	5.59046e-05	rs17577073	23.3949	6.96281e-05	44.4222	6.3654e-05
	62	rs715338	5.26871	1.56449e-05	47.0183	3.53241e-05	rs11567976	25.316	7.55203e-05	31.4254	7.04373e-05																rs4692709	24.5207	7.27846e-05	22.8272	2.29653e-05	rs17604349	29.9339	8.90881e-05	88.6799	0.000127064
	63	rs4643373	6.26233	1.85953e-05	34.5441	2.59526e-05	rs180769	28.1454	8.396e-05	30.5697	6.85194e-05																rs113493369	2.97528	8.83206e-06	45.9383	4.62151e-05	rs1800828	17.3761	5.17159e-05	34.5862	4.95603e-05
	64	rs56097173	15.6182	4.63751e-05	44.8493	3.36946e-05	rs1553132	22.5009	6.71229e-05	31.5047	7.06149e-05																rs1518394	9.85331	2.92487e-05	29.642	2.98211e-05	rs1931814	0.895259	2.66466e-06	58.4613	8.37693e-05
	65	rs12991815	12.7071	3.77316e-05	44.8493	3.36946e-05	rs9903973	14.7619	4.40378e-05	31.7234	7.11051e-05																rs528301822	21.6934	6.43927e-05	55.4198	5.57532e-05	rs2011528	19.8479	5.90721e-05	48.4138	6.93732e-05
	66	rs12187443	9.86967	2.93065e-05	44.8493	3.36946e-05	rs11614986	19.3704	5.77849e-05	30.8433	6.91326e-05																rs10811438	17.644	5.23736e-05	34.679	3.48884e-05	rs2072413	7.04873	2.09795e-05	32.6498	4.67857e-05
	67	rs9373590	9.49969	2.82079e-05	44.8493	3.36946e-05	rs2231265	30.0915	8.97649e-05	30.6588	6.87191e-05																rs1843815	34.3209	0.000101871	26.1235	2.62814e-05	rs2072727	23.9466	7.12701e-05	67.7164	9.70297e-05
	68	rs4592425	5.8737	1.74413e-05	44.8493	3.36946e-05	rs174560	19.3622	5.77603e-05	31.1609	6.98444e-05																rs9309116	26.4795	7.85984e-05	44.4444	4.47123e-05	rs2322605	7.52434	2.23951e-05	39.1	5.6028e-05
	69	rs11149313	8.42029	2.50029e-05	32.9505	2.47555e-05	rs10173260	17.3187	5.16647e-05	30.6868	6.87819e-05																rs9883093	12.9542	3.84531e-05	58.7778	5.91312e-05	rs2396004	16.3467	4.86524e-05	38.6262	5.53492e-05
	70	rs6019663	8.15312	2.42096e-05	32.9505	2.47555e-05	rs72804080	16.1618	4.82138e-05	30.9414	6.93525e-05																rs9939355	14.1145	4.18971e-05	32.1111	3.23051e-05	rs2506089	9.0039	2.67987e-05	33.8491	4.85042e-05
	71	rs62194948	0.277822	8.24975e-07	31.3931	2.35854e-05	rs12611523	19.7045	5.87814e-05	30.6124	6.86151e-05																rs910187	24.3979	7.24201e-05	41.5309	4.17813e-05	rs2514214	25.8377	7.68981e-05	39.5389	5.6657e-05
	72	rs6808140	2.56064	7.6036e-06	42.7296	3.21021e-05	rs11643715	29.2154	8.71516e-05	30.9136	6.92902e-05																rs12346996	23.1094	6.85956e-05	46.24	4.65186e-05	rs2550298	57.2248	0.000170296	122.036	0.00017485
	73	rs35110063	10.9246	3.24388e-05	42.7296	3.21021e-05	rs4538155	21.7052	6.47494e-05	30.0953	6.74561e-05																rs11071755	22.6569	6.72526e-05	22.8272	2.29653e-05	rs2580160	23.6692	7.04446e-05	47.9695	6.87366e-05
	74	rs1147852	3.36969	1.0006e-05	42.7296	3.21021e-05	rs34354917	16.9677	5.06176e-05	30.25	6.78029e-05																rs12031519	31.2807	9.28483e-05	24.2908	2.44377e-05	rs2593487	36.8056	0.000109537	54.3316	7.78524e-05
	75	rs324017	16.9368	5.02901e-05	31.3931	2.35854e-05	rs80193650	19.1022	5.69848e-05	30.1306	6.75352e-05																rs6663012	18.7435	5.5637e-05	31.7686	3.19605e-05	rs2653349	93.3679	0.000277825	234.396	0.000335782
	76	rs6562066	12.704	3.77222e-05	42.7296	3.21021e-05	rs10761674	20.562	6.13395e-05	29.6064	6.63604e-05																rs388016	28.248	8.38472e-05	34.679	3.48884e-05	rs2706762	13.7679	4.09775e-05	63.0118	9.02892e-05
	77	rs1038093	3.11093	9.23763e-06	42.7296	3.21021e-05	rs11190970	16.7334	4.99189e-05	29.8284	6.6858e-05																rs2943023‡	28.6171	8.49427e-05	35.0069	7.7335e-05	rs28380327	35.573	0.000105869	117.181	0.000167894
	78	rs11090039	13.2775	3.94252e-05	31.3931	2.35854e-05	rs1776776	NA	NA	34.1512	7.65464e-05																rs35127490	22.8074	6.76993e-05	38.716	3.89496e-05	rs2844016	6.71425	1.9984e-05	39.1125	5.6046e-05
	79	rs1861412	13.0343	3.87029e-05	40.6591	3.05467e-05																					rs9460110	17.8745	5.30576e-05	47.4568	4.77427e-05	rs28459838	27.9602	8.32143e-05	40.4369	5.79436e-05
	80	rs6888135	12.8125	3.80443e-05	40.6591	3.05467e-05																					rs3986805‡	18.4317	5.47115e-05	36	7.95287e-05	rs2850979	22.3395	6.64873e-05	38.502	5.51712e-05
	81	rs940780	7.96064	2.36381e-05	40.6591	3.05467e-05																					rs2143792‡	1.03341	3.06768e-06	35.0069	7.7335e-05	rs2901796	23.2157	6.90948e-05	42.0812	6.02996e-05
	82	rs12924275	21.1251	6.27256e-05	29.872	2.24427e-05																					rs10152428	25.6518	7.61416e-05	27.04	2.72035e-05	rs2978382	12.6382	3.76151e-05	37.0029	5.30231e-05
	83	rs2398144	0.377903	1.12216e-06	40.6591	3.05467e-05																					rs7422655	25.601	7.5991e-05	46.24	4.65186e-05	rs301218	12.1934	3.62915e-05	45.1584	6.47088e-05
	84	rs11679943	2.32464	6.90282e-06	38.6382	2.90284e-05																					rs35144585	32.0391	9.50992e-05	19.2249	1.93412e-05	rs308521	32.9044	9.79277e-05	77.9336	0.000111668
	85	rs6756610	31.4678	9.3433e-05	38.6382	2.90284e-05																					rs10875606	21.1608	6.28119e-05	60.4938	6.08575e-05	rs3100052	23.9905	7.14007e-05	48.6925	6.97725e-05
	86	rs62213452	12.0312	3.57247e-05	28.3873	2.13272e-05																					rs56180058	19.2332	5.70906e-05	22.5625	2.2699e-05	rs34054660	9.68514	2.88262e-05	32.8788	4.71138e-05
	87	rs7040224	12.5936	3.73945e-05	38.6382	2.90284e-05																					rs4357022	19.6538	5.83391e-05	32.1111	3.23051e-05	rs34329963	15.3534	4.5696e-05	35.629	5.10545e-05
	88	rs72773790	17.0424	5.06039e-05	38.6382	2.90284e-05																					rs4604518	20.1164	5.97122e-05	49	4.92951e-05	rs35346733	17.488	5.20488e-05	42.7716	6.12889e-05
	89	rs5877	5.08227	1.50913e-05	36.6669	2.75475e-05																					rs3732085	17.8475	5.29775e-05	49	4.92951e-05	rs36055559	19.5437	5.81669e-05	51.6386	7.39938e-05
	90	rs1530938	6.35204	1.88616e-05	36.6669	2.75475e-05																					rs7814873	19.5859	5.81376e-05	36	3.62173e-05	rs3743794	15.9139	4.73642e-05	37.0029	5.30231e-05
	91	rs7625896	13.0656	3.87959e-05	36.6669	2.75475e-05																					rs13263535	17.2022	5.10621e-05	47.4568	4.77427e-05	rs3796618	17.2509	5.13432e-05	36.1321	5.17754e-05
	92	rs1264419	0.120914	3.59045e-07	36.6669	2.75475e-05																					rs2836909	28.7807	8.54284e-05	34.679	3.48884e-05	rs3807651	16.1755	4.81427e-05	36.3609	5.21033e-05
	93	rs2737240	14.1324	4.19637e-05	26.939	2.02391e-05																					rs76824303	32.1114	9.53137e-05	29.16	2.93362e-05	rs3815983	14.2893	4.25291e-05	42.8763	6.14389e-05
	94	rs10756571	9.9563	2.95638e-05	36.6669	2.75475e-05																					rs112520848	22.4892	6.67547e-05	33.3827	3.35843e-05	rs3850174	32.4508	9.65779e-05	68.4922	9.81411e-05
	95	rs2221119	9.51637	2.82575e-05	36.6669	2.75475e-05																					rs253666	33.5444	9.95669e-05	26.01	2.61673e-05	rs4027217	9.45189	2.8132e-05	32.8902	4.71302e-05
	96	rs9540729	3.4229	1.0164e-05	36.6669	2.75475e-05																					rs17502738	34.7373	0.000103107	29.7521	2.99318e-05	rs412000	12.9196	3.84527e-05	39.9045	5.71807e-05
	97	rs34967082	6.54944	1.94478e-05	34.7454	2.61039e-05																					rs3810484	29.1305	8.64667e-05	49	4.92951e-05	rs42210	17.947	5.3415e-05	42.5234	6.09333e-05
	98	rs2216427	1.54145	4.57722e-06	34.7454	2.61039e-05																					rs2059639	25.3204	7.5158e-05	18.0625	1.81719e-05	rs4236237	8.08171	2.4054e-05	45.86	6.57141e-05
	99	rs6601080	0.749384	2.22524e-06	34.7454	2.61039e-05																					rs62560863	18.0493	5.35766e-05	42.25	4.25048e-05	rs4269995	30.7034	9.13779e-05	91.6998	0.000131391
	100	rs2598293	4.77139	1.41682e-05	34.7454	2.61039e-05																					rs11383197	16.839	4.99841e-05	16.9012	1.70036e-05	rs4419127	35.2172	0.00010481	141.348	0.000202514
	101	rs871994	0.00130193	3.86601e-09	34.7454	2.61039e-05																					rs189489‡	19.2113	5.70255e-05	30.6178	6.76394e-05	rs4550384	19.4236	5.78094e-05	39.9298	5.7217e-05
	102	rs1167132	0.207625	6.1653e-07	34.7454	2.61039e-05																					rs2699869	22.3261	6.62706e-05	36	3.62173e-05	rs4657983	8.80495	2.62066e-05	46.4442	6.65512e-05
	103	rs176644	27.5849	8.19049e-05	34.7454	2.61039e-05																					rs936944	16.7319	4.96664e-05	32.3477	3.2543e-05	rs4666682	26.1048	7.76927e-05	38.2171	5.4763e-05
	104	rs12605642	5.46473	1.62269e-05	34.7454	2.61039e-05																					rs2893323	17.4774	5.18791e-05	33.3827	3.35843e-05	rs4672458	27.7229	8.25082e-05	44.8498	6.42666e-05
	105	rs9964420	0.762863	2.26527e-06	25.5272	1.91785e-05																					rs35851551	24.5329	7.28208e-05	45.0816	4.53533e-05	rs4698678	19.7314	5.87255e-05	50.41	7.22334e-05
	106	rs72820274	6.27359	1.86287e-05	32.8738	2.46978e-05																					rs11502903‡	1.73988	5.16481e-06	29.4694	6.51026e-05	rs4729854	78.3826	0.000233245	172.844	0.000247627
	107	rs10928256	5.7977	1.72156e-05	32.8738	2.46978e-05																					rs3943782	11.9069	3.53445e-05	34.679	3.48884e-05	rs4761989	23.6776	7.04694e-05	41.6283	5.96507e-05
	108	rs4260410	1.16844	3.46959e-06	32.8738	2.46978e-05																					rs34728579	23.1399	6.8686e-05	55.5702	5.59046e-05	rs4775086	20.441	6.08374e-05	35.6409	5.10716e-05
	109	rs11722569	0.984645	2.92383e-06	32.8738	2.46978e-05																					rs2084839‡	7.77365	2.30756e-05	31.1736	6.88673e-05	rs4804951	13.1372	3.91004e-05	37.7979	5.41623e-05
	110	rs13138995	11.6081	3.44683e-05	32.8738	2.46978e-05																					rs73817091	28.6422	8.50172e-05	18.7778	1.88915e-05	rs481214	25.5177	7.59457e-05	34.5391	4.94929e-05
	111	rs6978112	2.93864	8.72602e-06	32.8738	2.46978e-05																					rs1941182	16.3097	4.84132e-05	41.5309	4.17813e-05	rs486416	21.5185	6.40439e-05	40.2971	5.77433e-05
	112	rs2030672	17.8713	5.30648e-05	32.8738	2.46978e-05																					rs2284015	34.2888	0.000101776	28.09	2.82598e-05	rs4878734	16.4138	4.88519e-05	32.7756	4.6966e-05
	113	rs874168	1.47105	4.36818e-06	32.8738	2.46978e-05																					rs140506252	21.1283	6.27156e-05	48.5494	4.88419e-05	rs4903203	28.062	8.35172e-05	44.8498	6.42666e-05
	114	rs10898940	8.59703	2.55277e-05	32.8738	2.46978e-05																					rs4356873	18.0505	5.35801e-05	40.96	4.1207e-05	rs5016898	16.2749	4.84387e-05	42.5626	6.09894e-05
	115	rs1567084	7.15507	2.12461e-05	31.0523	2.33294e-05																					rs12140153	NA	NA	173.91	0.000174936	rs555784	12.8317	3.81912e-05	43.4545	6.22673e-05
	116	rs1580173	10.0451	2.98274e-05	31.0523	2.33294e-05																					rs141957346	NA	NA	41.5309	4.17813e-05	rs55846845	18.6456	5.54941e-05	47.5548	6.81424e-05
	117	rs1357685	12.3446	3.66551e-05	31.0523	2.33294e-05																					rs13023587	NA	NA	57.0864	5.74298e-05	rs57236847	13.2944	3.95683e-05	37.8348	5.42152e-05
	118	rs4588900	16.6143	4.93328e-05	31.0523	2.33294e-05																					rs301817	NA	NA	47.4568	4.77427e-05	rs58681483	7.32586	2.18044e-05	36.1441	5.17927e-05
	119	rs28552587	17.0788	5.0712e-05	31.0523	2.33294e-05																					rs62189006	NA	NA	37.6178	3.78448e-05	rs6007594	13.2128	3.93253e-05	41.9774	6.0151e-05
	120	rs10955647	9.92626	2.94746e-05	31.0523	2.33294e-05																					rs11224896	NA	NA	50.0051	5.03062e-05	rs6047481	7.39406	2.20074e-05	38.378	5.49935e-05
	121	rs6597649	7.69487	2.28489e-05	31.0523	2.33294e-05																					rs12614085	NA	NA	37.8225	3.80507e-05	rs60616179	32.7775	9.75502e-05	43.4677	6.22862e-05
	122	rs10825503	3.04945	9.05507e-06	31.0523	2.33294e-05																					rs10639111	NA	NA	19.843	1.99631e-05	rs6131805	20.3891	6.06829e-05	49.773	7.13207e-05
	123	rs667730	5.20355	1.54514e-05	31.0523	2.33294e-05																					rs927184‡	NA	NA	30.6746	6.77649e-05	rs62182135	19.7895	5.88985e-05	55.577	7.96367e-05
	124	rs647905	1.91992	5.70106e-06	31.0523	2.33294e-05																										rs62465218	20.8658	6.21014e-05	36.1321	5.17754e-05
	125	rs10947987	6.66139	1.97802e-05	29.3822	2.20746e-05																										rs62479736	19.3488	5.75868e-05	42.9156	6.14952e-05
	126	rs4858708	9.75634	2.897e-05	31.2794	2.35e-05																										rs62553781	33.4725	9.96185e-05	55.6814	7.97864e-05
	127	rs2364921	15.2999	4.54299e-05	31.2794	2.35e-05																										rs6468316	27.2946	8.12336e-05	33.7677	4.83876e-05
	128	rs238869	4.07777	1.21085e-05	31.2794	2.35e-05																										rs6544906	13.5539	4.03405e-05	42.172	6.04298e-05
	129	rs190073	3.57214	1.06071e-05	31.2794	2.35e-05																										rs6560218	11.0883	3.30022e-05	35.3787	5.06959e-05
	130	rs9563886	7.47847	2.22064e-05	31.2794	2.35e-05																										rs66617308	16.135	4.80223e-05	32.9132	4.71631e-05
	131	rs2447094	0.880248	2.61384e-06	31.2794	2.35e-05																										rs6665637	20.5818	6.12564e-05	39.8035	5.7036e-05
	132	rs1553754	0.330226	9.80585e-07	31.2794	2.35e-05																										rs6690292	23.153	6.89083e-05	35.1649	5.03895e-05
	133	rs11588755	28.7662	8.5412e-05	33.238	2.49714e-05																										rs6718511	11.8509	3.52721e-05	36.012	5.16033e-05
	134	rs11119409	8.05169	2.39084e-05	33.238	2.49714e-05																										rs6794796	17.2513	5.13446e-05	43.5336	6.23807e-05
	135	rs728017	7.5587	2.24446e-05	33.238	2.49714e-05																										rs6816922	9.01654	2.68363e-05	32.9821	4.72618e-05
	136	rs1731951	12.0483	3.57754e-05	33.238	2.49714e-05																										rs6846730	28.683	8.53654e-05	63.7762	9.13843e-05
	137	rs4788203	3.12911	9.2916e-06	33.238	2.49714e-05																										rs695459	20.7053	6.16238e-05	35.7484	5.12257e-05
	138	rs12454003	5.96607	1.77156e-05	33.238	2.49714e-05																										rs6958557	16.6731	4.96236e-05	52.8384	7.57128e-05
	139	rs910187	11.1675	3.316e-05	33.238	2.49714e-05																										rs710284	7.89089	2.34861e-05	34.7864	4.98472e-05
	140	rs34036083	0.0578307	1.71725e-07	35.2582	2.64892e-05																										rs711098	11.5871	3.44869e-05	37.149	5.32325e-05
	141	rs12520974	11.742	3.4866e-05	35.2582	2.64892e-05																										rs7111582	33.5399	9.98189e-05	62.7423	8.99029e-05
	142	rs701394	11.7311	3.48336e-05	35.2582	2.64892e-05																										rs7143933	8.4928	2.52775e-05	36.9907	5.30057e-05
	143	rs37445	0.70034	2.07961e-06	35.2582	2.64892e-05																										rs71523448	21.6918	6.45597e-05	59.7838	8.56642e-05
	144	rs17367725	0.000852464	2.53134e-09	35.2582	2.64892e-05																										rs7203707	26.5503	7.90188e-05	42.4843	6.08772e-05
	145	rs9469434	0.852069	2.53016e-06	25.904	1.94616e-05																										rs72829706	23.5249	7.0015e-05	45.4815	6.51718e-05
	146	rs10758593	1.37137	4.07218e-06	35.2582	2.64892e-05																										rs72950188	17.5838	5.23342e-05	44.8364	6.42474e-05
	147	rs7402939	1.23072	3.65454e-06	35.2582	2.64892e-05																										rs72966564	19.9223	5.92936e-05	36.7357	5.26403e-05
	148	rs2838787	7.15818	2.12553e-05	35.2582	2.64892e-05																										rs7298532	13.9959	4.16559e-05	45.1987	6.47666e-05
	149	rs6702604	11.3354	3.36586e-05	37.3402	2.80533e-05																										rs7299922	31.4833	9.36989e-05	47.2794	6.77478e-05
	150	rs823247	14.2197	4.22227e-05	37.3402	2.80533e-05																										rs73026775	13.6395	4.05953e-05	34.4334	4.93414e-05
	151	rs1519102	4.24961	1.26188e-05	37.3402	2.80533e-05																										rs73050286	14.976	4.4573e-05	48.1914	6.90545e-05
	152	rs1064213	0.00125514	3.72707e-09	37.3402	2.80533e-05																										rs74357745	27.1068	8.06749e-05	43.0336	6.16643e-05
	153	rs7599697	0.758379	2.25196e-06	37.3402	2.80533e-05																										rs747003	22.9851	6.84087e-05	33.8957	4.85709e-05
	154	rs2388840	3.44864	1.02404e-05	37.3402	2.80533e-05																										rs7649164	14.3051	4.25762e-05	37.0516	5.30929e-05
	155	rs7475916	10.9923	3.264e-05	37.3402	2.80533e-05																										rs766406	7.48387	2.22746e-05	41.7704	5.98543e-05
	156	rs4767645	11.8216	3.51023e-05	37.3402	2.80533e-05																										rs77248969	16.3532	4.86715e-05	37.6014	5.38808e-05
	157	rs6510033	0.281344	8.35434e-07	27.4336	2.06107e-05																										rs7900191	28.3913	8.44973e-05	32.7184	4.6884e-05
	158	rs623025	13.5156	4.0132e-05	29.0088	2.17941e-05																										rs7943634	20.1221	5.98883e-05	41.332	5.92262e-05
	159	rs73163783	6.3229	1.87751e-05	29.0088	2.17941e-05																										rs80097534	22.7161	6.76082e-05	38.8129	5.56166e-05
	160	rs10944696	3.88684	1.15416e-05	29.0088	2.17941e-05																										rs80271258	90.8696	0.000270393	208.138	0.000298178
	161	rs6973090	6.68499	1.98503e-05	29.0088	2.17941e-05																										rs8072058	17.0174	5.06484e-05	36.3971	5.21551e-05
	162	rs671985	8.78688	2.60914e-05	39.4842	2.9664e-05																										rs909757	14.545	4.32903e-05	36.012	5.16033e-05
	163	rs11001276	3.95876	1.17552e-05	29.0088	2.17941e-05																										rs9347926	22.2744	6.62935e-05	60.2952	8.63969e-05
	164	rs214934	1.19978	3.56267e-06	39.4842	2.9664e-05																										rs9348050	37.4954	0.00011159	46.7172	6.69423e-05
	165	rs6589988	2.20435	6.54564e-06	39.4842	2.9664e-05																										rs938836	20.5896	6.12797e-05	40.9856	5.87298e-05
	166	rs8181889	0.216194	6.41973e-07	39.4842	2.9664e-05																										rs9416744	25.3045	7.53113e-05	76.4226	0.000109503
	167	rs1536053	2.59407	7.70286e-06	39.4842	2.9664e-05																										rs9573980	76.8008	0.000228539	172.502	0.000247138
	168	rs3184470	7.80664	2.31808e-05	39.4842	2.9664e-05																										rs9597241	30.342	9.03023e-05	60.9649	8.73564e-05
	169	rs8076183	4.31479	1.28123e-05	39.4842	2.9664e-05																										rs9611597	6.88101	2.04804e-05	53.8169	7.71149e-05
	170	rs1937447	0.726915	2.15852e-06	30.6296	2.30118e-05																										rs962961	28.4332	8.4622e-05	47.7619	6.84392e-05
	171	rs7571486	6.75378	2.00545e-05	30.6296	2.30118e-05																										rs9636202	18.0005	5.35742e-05	48.0942	6.89153e-05
	172	rs4502882	0.679786	2.01858e-06	41.6903	3.13214e-05																										rs9664044	20.6036	6.13214e-05	39.5138	5.66209e-05
	173	rs6457796	7.59615	2.25558e-05	30.6296	2.30118e-05																										rs975025	31.8208	9.47031e-05	61.5911	8.82536e-05
	174	rs4090240	3.4137	1.01367e-05	30.6296	2.30118e-05																										rs9817910	28.7161	8.54638e-05	44.7026	6.40557e-05
	175	rs12251016	6.555	1.94643e-05	41.6903	3.13214e-05																										rs9836621	13.8261	4.11505e-05	59.5058	8.52658e-05
	176	rs224029	19.866	5.89875e-05	41.6903	3.13214e-05																										rs9964420	50.3313	0.000149785	179.265	0.000256825
	177	rs566673	5.43176	1.6129e-05	41.6903	3.13214e-05																										rs9997394	14.6293	4.3541e-05	40.9088	5.86198e-05
	178	rs10502966	2.98074	8.85104e-06	41.6903	3.13214e-05																										rs10109566	15.8946	4.73067e-05	36.385	5.21378e-05
	179	rs7615602	3.64977	1.08377e-05	32.2963	2.42639e-05																										rs1013987	29.9665	8.91851e-05	57.1083	8.18307e-05
	180	rs521484	1.60688	4.7715e-06	32.2963	2.42639e-05																										rs10175975	27.77	8.26484e-05	40.781	5.84367e-05
	181	rs75932578	1.37976	4.09711e-06	32.2963	2.42639e-05																										rs10254050	41.9995	0.000124993	138.086	0.000197841
	182	rs12790660	12.5525	3.72725e-05	43.9588	3.30256e-05																										rs10402849	17.1853	5.1148e-05	38.6635	5.54026e-05
	183	rs2389631	9.17453	2.72425e-05	43.9588	3.30256e-05																										rs1064213	43.9912	0.000130919	147.987	0.000212024
	184	rs2089358	5.25153	1.55939e-05	34.0089	2.55506e-05																										rs10759208	17.0354	5.07018e-05	42.7454	6.12514e-05
	185	rs1289939	0.983932	2.92172e-06	34.0089	2.55506e-05																										rs10762434	11.6214	3.4589e-05	34.3982	4.9291e-05
	186	rs11803128	0.1189	3.53066e-07	46.2899	3.47768e-05																										rs10877962	21.7453	6.47191e-05	82.901	0.000118785
	187	rs6545798	6.84457	2.03241e-05	46.2899	3.47768e-05																										rs10916892	40.9637	0.00012191	87.1796	0.000124915
	188	rs4664299	1.92622	5.71977e-06	34.0089	2.55506e-05																										rs11032362	58.0325	0.000172699	130.508	0.000186986
	189	rs3774751	5.22127	1.5504e-05	46.2899	3.47768e-05																										rs11102807	26.5782	7.91017e-05	36.5299	5.23455e-05
	190	rs7044885	2.9491	8.7571e-06	46.2899	3.47768e-05																										rs111261826	18.6894	5.56244e-05	47.9695	6.87366e-05
	191	rs6734957	6.66004	1.97762e-05	35.7676	2.68718e-05																										rs11152350	21.5035	6.39994e-05	60.4351	8.65973e-05
	192	rs62301574	1.15244	3.42209e-06	35.7676	2.68718e-05																										rs11154718	12.3227	3.66763e-05	40.2717	5.77069e-05
	193	rs12917449	3.56866	1.05968e-05	27.3846	2.05739e-05																										rs113161209	13.0574	3.88628e-05	33.3737	4.7823e-05
	194	rs9889282	9.30852	2.76403e-05	48.6837	3.65752e-05																										rs114848860	32.8865	9.78745e-05	60.4506	8.66196e-05
	195	rs11126082	1.77634	5.27471e-06	51.1404	3.84208e-05																										rs115073088	20.7177	6.16609e-05	52.7076	7.55254e-05
	196	rs984306	0.809149	2.40271e-06	37.5725	2.82278e-05																										rs1163628	23.8189	7.08899e-05	38.279	5.48516e-05
	197	rs314281	34.7578	0.0001032	51.1404	3.84208e-05																										rs11641239	16.6651	4.95998e-05	37.7119	5.4039e-05
	198	rs10761240	10.2015	3.02919e-05	51.1404	3.84208e-05																										rs11677484	23.524	7.00125e-05	40.6534	5.82538e-05
	199	rs12912299	20.0274	5.94665e-05	51.1404	3.84208e-05																										rs11678584	13.0941	3.89721e-05	37.9579	5.43916e-05
	200	rs4238755	4.00563	1.18943e-05	37.5725	2.82278e-05																										rs11681299	13.1425	3.91159e-05	37.1856	5.3285e-05
	201	rs60565673	19.3746	5.75283e-05	51.1404	3.84208e-05																										rs118047999	9.5	2.82752e-05	35.1175	5.03216e-05
	202	rs12983032	18.6769	5.5457e-05	51.1404	3.84208e-05																										rs11845599	20.6428	6.14378e-05	57.2595	8.20474e-05
	203	rs694786	6.28087	1.86503e-05	53.6602	4.03139e-05																										rs12040629	82.6965	0.000246079	217.917	0.000312182
	204	rs17083297	7.1758	2.13076e-05	30.1839	2.26769e-05																										rs12051	20.6484	6.14546e-05	57.4109	8.22643e-05
	205	rs3131638	5.64035	1.67484e-05	39.4238	2.96187e-05																										rs12195792	15.1516	4.50954e-05	67.3877	9.65587e-05
	206	rs6967168	15.7676	4.68187e-05	39.4238	2.96187e-05																										rs12206814	23.8476	7.09756e-05	35.7365	5.12085e-05
	207	rs524859	23.5059	6.97943e-05	53.6602	4.03139e-05																										rs12380242	15.0586	4.48186e-05	41.6025	5.96138e-05
	208	rs61921611	1.09864	3.26235e-06	53.6602	4.03139e-05																										rs12442008	25.4775	7.5826e-05	47.3895	6.79055e-05
	209	rs7214267	24.0845	7.15123e-05	53.6602	4.03139e-05																										rs12464387	25.531	7.59852e-05	40.8705	5.85648e-05
	210	rs61765555	4.7245	1.40289e-05	41.3217	3.10444e-05																										rs12470914	23.1034	6.87606e-05	78.4996	0.000112479
	211	rs11605348	19.9517	5.92417e-05	56.2434	4.22545e-05																										rs12600452	7.67388	2.28402e-05	39.3505	5.6387e-05
	212	rs16990210	9.45217	2.80669e-05	33.1257	2.48871e-05																										rs12636669	11.5599	3.44061e-05	87.1422	0.000124861
	213	rs12540241	5.3274	1.58191e-05	33.1257	2.48871e-05																										rs12871550	26.3177	7.83264e-05	55.0416	7.88695e-05
	214	rs10947690	12.5741	3.73367e-05	45.2575	3.40013e-05																										rs12969848	35.6828	0.000106196	100.621	0.000144171
	215	rs4702	0.454741	1.35032e-06	64.3749	4.83632e-05																										rs13011556	29.1179	8.66597e-05	60.544	8.67533e-05
	216	rs73079014	5.84258	1.73489e-05	29.8726	2.24431e-05																										rs13414393	16.3621	4.86982e-05	37.1125	5.31801e-05
	217	rs8180817	14.7543	4.38101e-05	67.2133	5.04955e-05																										rs1398346	21.005	6.25158e-05	32.9361	4.7196e-05
	218	rs76145129	10.4539	3.10414e-05	31.1627	2.34123e-05																										rs1421085	69.2824	0.000206171	152.621	0.000218662
	219	rs1031654	10.1811	3.02312e-05	53.6939	4.03392e-05																										rs1449403	33.7696	0.000100502	56.8064	8.13982e-05
	220	rs152555	8.39684	2.49333e-05	42.8149	3.21662e-05																										rs1474754	13.0841	3.89422e-05	34.8808	4.99825e-05
	221	rs2431108	27.9761	8.30665e-05	79.2123	5.95095e-05																										rs1559253	4.21126	1.25343e-05	37.3565	5.35299e-05
	222	rs9394502	8.346	2.47823e-05	82.3743	6.18849e-05																										rs1599374	23.4404	6.97635e-05	68.3267	9.79041e-05
	223	rs4709655	4.32944	1.28559e-05	36.6108	2.75053e-05																										rs17396357	10.709	3.18735e-05	34.3162	4.91734e-05
	224	rs28582096	9.12574	2.70976e-05	60.5199	4.54672e-05																										rs17448682	32.418	9.64804e-05	73.5135	0.000105335
	225	rs4981170	4.46255	1.32511e-05	46.3356	3.48112e-05																										rs17712705	19.7258	5.87087e-05	38.3409	5.49403e-05
	226	rs72657797	4.6679	1.38608e-05	48.151	3.6175e-05																										rs1788784	11.0211	3.28022e-05	43.1255	6.1796e-05
	227	rs8180457	11.1662	3.31562e-05	48.151	3.6175e-05																										rs1799464	17.8178	5.30303e-05	33.8258	4.84708e-05
	228	rs73671843	2.36338	7.01786e-06	38.0452	2.85829e-05																										rs1811899	18.245	5.43018e-05	40.4114	5.79071e-05
	229	rs13010288	9.00887	2.67506e-05	44.0749	3.31128e-05																										rs184033703	36.7207	0.000109284	60.2331	8.63079e-05
	230	rs62383308	0.060239	1.78876e-07	29.5047	2.21667e-05																										rs1843888	12.9608	3.85753e-05	209.352	0.000299916
	231	rs17643634	2.4056	7.14323e-06	55.7822	4.1908e-05																										rs187028	18.8832	5.62011e-05	44.289	6.34631e-05
	232	rs66674044	4.95431	1.47113e-05	44.0749	3.31128e-05																										rs1871729	16.437	4.89211e-05	36.6146	5.24668e-05
	233	rs6119267	11.7138	3.47821e-05	99.1684	7.45007e-05																										rs1873958	14.5868	4.34146e-05	68.89	9.87111e-05
	234	rs492858	1.79454	5.32874e-06	36.1527	2.71611e-05																										rs1886205	21.9081	6.52034e-05	61.8425	8.86138e-05
	235	rs10947428	16.753	4.97445e-05	95.1429	7.14767e-05																										rs2050185	18.4448	5.48964e-05	36.9542	5.29534e-05
	236	rs79693059	7.61754	2.26193e-05	43.5248	3.26996e-05																										rs2166559	23.5258	7.00177e-05	40.0562	5.73982e-05
	237	rs9527083	15.116	4.48841e-05	159.608	0.000119901																										rs2298117	15.984	4.75728e-05	37.9333	5.43563e-05
	238	rs11838830	2.39816	7.12114e-06	37.9892	2.85409e-05																										rs2304467	17.5233	5.2154e-05	36.9056	5.28838e-05
	239	rs4699157	4.64408	1.37901e-05	29.3114	2.20215e-05																										rs2362775	25.5876	7.61538e-05	37.1612	5.325e-05
	240	rs7432782	0.888717	2.63898e-06	35.4719	2.66497e-05																										rs2396719	23.5479	7.00836e-05	55.8009	7.99575e-05
	241	rs13135092	6.39362	1.89851e-05	65.2147	4.89941e-05																										rs2433634	13.2843	3.95381e-05	42.6801	6.11578e-05
	242	rs17520265	9.4426	2.80384e-05	32.3614	2.43129e-05																										rs247929	26.8724	7.99773e-05	77.2992	0.000110759
	243	rs78206187	5.55836	1.65049e-05	52.6302	3.954e-05																										rs2648721	18.3994	5.47614e-05	34.3513	4.92238e-05
	244	rs117630493	0.67193	1.99525e-06	31.4384	2.36194e-05																										rs2737245	31.4498	9.35992e-05	78.6059	0.000112631
	245	rs138678612	6.46994	1.92117e-05	33.9503	2.55066e-05																										rs2878172	8.47685	2.523e-05	36.857	5.28142e-05
	246	rs77641763	NA	NA	62.9201	4.72703e-05																										rs2881955	22.1563	6.59422e-05	47.3344	6.78267e-05
	247	rs62590551	NA	NA	29.6896	2.23056e-05																										rs2916148	33.7023	0.000100302	63.3775	9.08131e-05
	248	rs17324524	NA	NA	41.0014	3.08038e-05																										rs2944831	20.4883	6.09782e-05	46.2944	6.63365e-05
	249																															rs295268	24.7496	7.36598e-05	44.9168	6.43626e-05
	250																															rs2979139	26.289	7.8241e-05	62.8532	9.00619e-05
	251																															rs3138490	24.963	7.4295e-05	41.7704	5.98543e-05
	252																															rs34509802	19.4087	5.77651e-05	55.2346	7.91462e-05
	253																															rs34967119	14.0505	4.18185e-05	35.928	5.1483e-05
	254																															rs35524253	24.5016	7.29219e-05	83.2291	0.000119255
	255																															rs359248	20.3867	6.06757e-05	74.0288	0.000106074
	256																															rs3760381	21.1094	6.28264e-05	43.0598	6.17019e-05
	257																															rs3782860	11.7821	3.50673e-05	47.0185	6.73739e-05
	258																															rs3808964	23.7028	7.05445e-05	35.4382	5.07811e-05
	259																															rs3857599	26.6168	7.92167e-05	39.2126	5.61894e-05
	260																															rs3867239	16.0289	4.77063e-05	49.4631	7.08767e-05
	261																															rs3923809	12.6569	3.76707e-05	33.6632	4.82378e-05
	262																															rs3955311	19.0959	5.68342e-05	33.9306	4.8621e-05
	263																															rs4121878	13.7699	4.09832e-05	36.4454	5.22243e-05
	264																															rs4241964	44.9724	0.000133839	71.0649	0.000101827
	265																															rs4365329	17.5686	5.22889e-05	33.9772	4.86878e-05
	266																															rs4535583	13.4271	3.99631e-05	33.2929	4.77072e-05
	267																															rs4550782	22.3317	6.64642e-05	52.3742	7.50477e-05
	268																															rs45597035	12.7176	3.78514e-05	34.5979	4.95771e-05
	269																															rs465670	20.3521	6.05726e-05	43.7715	6.27215e-05
	270																															rs4690085	20.8025	6.19132e-05	34.5744	4.95434e-05
	271																															rs4785296	19.9806	5.94672e-05	40.3352	5.77979e-05
	272																															rs4800998	16.3245	4.85863e-05	62.489	8.95401e-05
	273																															rs4860734	10.8398	3.22629e-05	33.9889	4.87045e-05
	274																															rs487722	15.1717	4.51555e-05	39.7404	5.69456e-05
	275																															rs4923541	19.0537	5.67087e-05	42.0942	6.03182e-05
	276																															rs4936290	20.6563	6.14779e-05	45.3602	6.4998e-05
	277																															rs495593	11.5275	3.43094e-05	38.2171	5.4763e-05
	278																															rs497338	17.895	5.32601e-05	44.5556	6.38451e-05
	279																															rs56113850	20.5557	6.11787e-05	44.0896	6.31774e-05
	280																															rs58876439	16.0947	4.79024e-05	48.4973	6.94929e-05
	281																															rs59986227	24.3673	7.25221e-05	50.1831	7.19082e-05
	282																															rs6131942	20.1435	5.99518e-05	71.4194	0.000102335
	283																															rs61773390	80.558	0.000239717	197.712	0.000283245
	284																															rs61875203	13.4411	4.00047e-05	39.5515	5.6675e-05
	285																															rs61990287	21.7916	6.48568e-05	37.1612	5.325e-05
	286																															rs62082402	48.7462	0.000145068	86.5458	0.000124007
	287																															rs62124718	16.3662	4.87104e-05	58.7676	8.42081e-05
	288																															rs621421	19.1781	5.70788e-05	64.1281	9.18885e-05
	289																															rs6429233	18.6963	5.5645e-05	35.6767	5.11229e-05
	290																															rs6433478	12.8339	3.81978e-05	50.5521	7.2437e-05
	291																															rs6440833	14.1517	4.21196e-05	41.2421	5.90973e-05
	292																															rs6477309	34.4538	0.000102538	67.4534	9.66528e-05
	293																															rs6573308	7.40435	2.2038e-05	35.952	5.15174e-05
	294																															rs662094	14.8731	4.42665e-05	57.1687	8.19173e-05
	295																															rs66507804	19.8999	5.92271e-05	47.9418	6.86969e-05
	296																															rs6727752	17.6686	5.25866e-05	44.1826	6.33106e-05
	297																															rs67988891	34.0133	0.000101228	84.6768	0.000121329
	298																															rs6838677	7.80799	2.32393e-05	33.9772	4.86878e-05
	299																															rs6967481	54.9502	0.000163528	96.1184	0.000137721
	300																															rs6968240	10.707	3.18675e-05	43.8509	6.28353e-05
	301																															rs6988733	9.56761	2.84764e-05	33.884	4.85542e-05
	302																															rs6993892	31.0348	9.23641e-05	92.1408	0.000132022
	303																															rs7006885	4.12311	1.2272e-05	51.1511	7.32953e-05
	304																															rs7225002	13.6651	4.06714e-05	32.8329	4.70481e-05
	305																															rs7248205	19.0557	5.67147e-05	55.8607	8.00432e-05
	306																															rs72720396	65.13	0.000193817	97.9704	0.000140374
	307																															rs72729847	11.3721	3.38469e-05	45.3064	6.49208e-05
	308																															rs72773411	14.6292	4.35409e-05	33.9073	4.85876e-05
	309																															rs72790386	15.847	4.71653e-05	34.5274	4.9476e-05
	310																															rs72796401	34.7239	0.000103342	56.716	8.12686e-05
	311																															rs72841368	24.6607	7.33953e-05	48.972	7.0173e-05
	312																															rs7304278	31.3059	9.31708e-05	64.883	9.29702e-05
	313																															rs7429614	34.3534	0.00010224	88.8118	0.000127253
	314																															rs75120545	37.2464	0.000110849	76.58	0.000109729
	315																															rs7602499	17.9585	5.34493e-05	33.3622	4.78065e-05
	316																															rs76064513	5.07163	1.50951e-05	33.6748	4.82544e-05
	317																															rs7626335	14.0473	4.18091e-05	52.0418	7.45715e-05
	318																															rs76518095	17.3168	5.15395e-05	36.6025	5.24494e-05
	319																															rs7700110	13.4932	4.01599e-05	37.9826	5.44269e-05
	320																															rs7701529	34.1789	0.00010172	52.3452	7.50062e-05
	321																															rs7721608	13.1884	3.92527e-05	39.5012	5.66029e-05
	322																															rs7735794	16.957	5.04685e-05	34.3044	4.91566e-05
	323																															rs77960	28.6328	8.5216e-05	46.3489	6.64145e-05
	324																															rs7845620	23.3252	6.94207e-05	86.2112	0.000123527
	325																															rs78580841	5.40079	1.60748e-05	48.2191	6.90943e-05
	326																															rs7959983	33.759	0.000100471	72.4882	0.000103866
	327																															rs7975791	24.9948	7.43894e-05	37.5401	5.37929e-05
	328																															rs8044054	29.6405	8.82148e-05	76.5275	0.000109654
	329																															rs812925	29.2606	8.70842e-05	76.6325	0.000109804
	330																															rs848552	20.1567	5.99912e-05	62.3626	8.9359e-05
	331																															rs9381812	40.5799	0.000120768	160.656	0.00023017
	332																															rs9394154	27.4455	8.16826e-05	41.3835	5.92999e-05
	333																															rs9436119	51.6532	0.000153718	142.086	0.000203572
	334																															rs9465253	18.6252	5.54335e-05	38.6511	5.53848e-05
	335																															rs9476310	0.818536	2.4363e-06	56.4001	8.08161e-05
	336																															rs9479402	48.7096	0.000144959	157.904	0.000226229
	337																															rs9496623	13.726	4.08527e-05	34.0822	4.88382e-05
	338																															rs9558942	7.04127	2.09573e-05	32.9017	4.71466e-05
	339																															rs9571526	7.99095	2.37839e-05	37.5034	5.37403e-05
	340																															rs9950528	15.0658	4.48401e-05	37.8717	5.4268e-05
	341																															rs9956387	25.7467	7.66271e-05	33.9772	4.86878e-05
	342																															rs146820337	NA	NA	NA	NA
	343																															rs10610420	NA	NA	NA	NA
	344																															rs9991917‡	NA	NA	35.5279	0.000143184
	345																															rs67169439	NA	NA	NA	NA
	346																															rs34125199	NA	NA	NA	NA
	347																															rs28458909	NA	NA	161.061	0.000230751
	348																															rs60521023	NA	NA	NA	NA
	349																															rs3747463‡	NA	NA	38.3914	0.000154723
	350																															rs213462‡	NA	NA	52.7076	0.000212407
	351																															rs7060620‡	NA	NA	50.7939	0.000204696

## Sheet: ST8
Supplementary Table 8: Associations of sleep traits unweighted allele score with risk factors for diabetes in the UK Biobank
Risk factors for diabetes	Insomnia symptoms			24-hour sleep duration			Short sleep duration (<=6 hours vs 7-8 hours)			Long sleep duration (>=9 hours vs 7-8 hours)			Daytime sleepiness			Daytime napping			Chronotype (evening preference)
	Beta	SE	p-value	Beta	SE	p-value	Beta	SE	p-value	Beta	SE	p-value	Beta	SE	p-value	Beta	SE	p-value	Beta	SE	p-value
Smoking (former vs never)	0.452384	0.0385639	8.99399e-32	-0.0310781	0.0204375	0.128351	0.011423	0.011897	0.336977	-0.00569153	0.0053576	0.288087	0.0589489	0.0147855	6.69418e-05	0.0715643	0.0262243	0.00635437	0.063079	0.0439324	0.151054
Smoking (current vs never)	0.826432	0.0613012	2.0602e-41	-0.0022847	0.0324875	0.943934	0.0513193	0.0189115	0.00665469	0.0066831	0.00851644	0.432613	0.0373217	0.023503	0.112297	0.150131	0.0416641	0.000314177	0.191638	0.0698349	0.00606707
Alcohol (3 or 4 times a week vs daily)	-0.0843634	0.0524298	0.107601	-0.0334692	0.0277845	0.228358	0.0233328	0.0161716	0.149071	-0.0128517	0.00728317	0.0776357	0.035774	0.0200942	0.0750257	0.128238	0.0356574	0.000322706	-0.122813	0.0597109	0.0397067
Alcohol (1 or 2 times a week vs daily)	0.0155086	0.0517753	0.764531	-0.0811388	0.0274376	0.0031046	0.0283359	0.0159698	0.0760061	-0.0317916	0.00719226	9.8618e-06	0.0305403	0.0198434	0.123788	0.146579	0.0352056	3.1345e-05	-0.12848	0.0589656	0.0293396
Alcohol (1 to3 times a month vs daily)	0.274503	0.0658898	3.09932e-05	-0.095671	0.0349174	0.00614567	0.0903246	0.0203233	8.81673e-06	-0.0206504	0.00915293	0.0240621	0.103471	0.0252529	4.17917e-05	0.169088	0.0447973	0.000160352	-0.0346372	0.0750402	0.644382
Alcohol (Occasionally vs daily)	0.406215	0.0673614	1.63747e-09	-0.0496029	0.0356973	0.164669	0.100424	0.0207772	1.34293e-06	-0.0405284	0.00935736	1.48356e-05	0.120479	0.0258169	3.06243e-06	0.249958	0.0458134	4.87355e-08	-0.202601	0.0767162	0.0082686
Alcohol (Never vs daily)	0.504329	0.0793975	2.12861e-10	-0.116613	0.0420756	0.00558001	0.11954	0.0244896	1.05461e-06	-0.01375	0.0110293	0.212517	0.0607428	0.0304298	0.0459173	0.195527	0.0539665	0.000291119	-0.189313	0.0904237	0.0362945
Townsend index	0.087256	0.00642939	6.06978e-42	-0.01096	0.00340711	0.00129643	0.00847718	0.0019832	1.91617e-05	-0.000680761	0.000893148	0.445939	0.00344981	0.0024644	0.161557	0.0115654	0.00437242	0.00816738	0.0399854	0.00732181	4.73419e-08
Education (College or university degree / NVQ or HND or HNC or equivalent vs None)	-0.360047	0.0617306	5.46351e-09	-0.0552388	0.0327101	0.0912703	-0.029908	0.0190397	0.116225	-0.0244546	0.00857575	0.00435022	-0.0406886	0.0236623	0.0855143	-0.076797	0.0419461	0.0671244	0.159534	0.0703037	0.0232562
Education (Other prof.equal. Eg: nursing, teaching vs None)	-0.481021	0.0882856	5.08431e-08	-0.0431318	0.0467812	0.356534	-0.0895449	0.0272302	0.00100754	-0.0131607	0.0122648	0.283252	-0.0588686	0.0338412	0.0819388	-0.0833365	0.0599807	0.164716	0.264094	0.100547	0.00862509
Education (A levels / AS levels or equivalent vs None)	-0.587877	0.0665643	1.03567e-18	0.0151626	0.0352714	0.66728	-0.0996549	0.0205306	1.21072e-06	-0.0251297	0.00924726	0.00657749	-0.0321905	0.0255151	0.207085	-0.124014	0.0452195	0.00609811	0.223268	0.0758087	0.00322812
Education (O levels / GCSEs or equivalent / CSEs or equivalent vs None)	-0.717347	0.0522923	8.13375e-43	0.0682862	0.0277089	0.0137241	-0.12151	0.0161287	4.94044e-14	-0.00921045	0.00726456	0.204849	-0.0351209	0.0200444	0.079749	-0.125323	0.0355246	0.00041914	0.309966	0.0595546	1.94392e-07
BMI	0.0792863	0.00374136	1.3195e-99	-0.0153465	0.00198377	1.02823e-14	0.00914367	0.00115471	2.40975e-15	-0.006823	0.000519956	2.51083e-39	0.013076	0.00143465	7.95388e-20	0.0182862	0.00254588	6.84987e-13	-0.00249911	0.00426404	0.557817
Diagnosed sleep apnoea	0.238885	0.258201	0.354869	-0.152499	0.136803	0.264963	0.106608	0.0796335	0.180659	-0.0581632	0.0358624	0.104838	0.261167	0.0989514	0.00830702	0.19154	0.176471	0.27775	-0.013714	0.294015	0.962797
Days of vigorous physical activity per week (1 day vs 0 day)	-0.457377	0.0560798	3.48028e-16	0.0706958	0.0297065	0.0173222	-0.0645171	0.0173005	0.000192112	-0.00873034	0.00778934	0.262371	-0.0202139	0.021494	0.346991	-0.0545197	0.0381246	0.152707	0.0895819	0.0638832	0.160834
Days of vigorous physical activity per week (2 day vs 0 day)	-0.479095	0.0539141	6.35178e-19	0.0598075	0.0285593	0.0362471	-0.0518045	0.0166323	0.00184158	-0.000331477	0.00748854	0.964693	-0.0364112	0.0206639	0.0780591	-0.0590501	0.0366287	0.106935	-0.0155863	0.0614162	0.799665
Days of vigorous physical activity per week (3 day vs 0 day)	-0.400703	0.0568778	1.85856e-12	0.0310798	0.0301292	0.302284	-0.0379209	0.0175466	0.0306848	-0.00965887	0.00790019	0.221477	-0.00531815	0.0217999	0.807267	-0.00562705	0.0386553	0.884261	-0.1582	0.0647923	0.0146209
Days of vigorous physical activity per week (4 day vs 0 day)	-0.286234	0.0773061	0.000213431	0.0255849	0.0409505	0.532118	-0.0451716	0.0238487	0.0582141	-0.0215516	0.0107376	0.0447391	0.0223914	0.0296295	0.449821	-0.0316349	0.0525459	0.547146	0.0134204	0.0880632	0.878875
Days of vigorous physical activity per week (5 day vs 0 day)	-0.268521	0.0762494	0.000428982	-0.0160743	0.0403907	0.690653	-0.0134139	0.0235227	0.568507	-0.0079346	0.0105908	0.453741	-0.104738	0.0292245	0.000338523	-0.124657	0.0518418	0.0161922	-0.429684	0.0868594	7.54456e-07
Days of vigorous physical activity per week (6 day vs 0 day)	-0.475517	0.133726	0.000376747	0.0121312	0.0708373	0.864023	-0.0261227	0.0412542	0.526595	-0.00797142	0.0185743	0.667803	-0.0483086	0.051254	0.34592	-0.0366114	0.0910004	0.687447	-0.409908	0.152334	0.00712747
Days of vigorous physical activity per week (7 day vs 0 day)	-0.322569	0.101705	0.00151616	0.0349135	0.0538752	0.516957	-0.00162487	0.0313758	0.958698	-0.00488643	0.0141266	0.729417	0.0347687	0.0389812	0.372428	-0.0041055	0.0692534	0.952727	-0.511709	0.115858	1.00248e-05
Bold p<0.05/7 = 7E-03
Adjusted for sex, age, assessment centre, chip, 40 genetic principal components

## Sheet: ST9
Supplementary Table 9: Proxies of genetic variants of sleep traits used in two-sample Mendelian randomization analysis
Exposure	Insomnia symptoms			24-hour sleep duration			Short sleep duration (<=6 hours vs 7-8 hours)			Long sleep duration (>=9 hours vs 7-8 hours)			Daytime sleepiness			Daytime napping			Chronotype (evening preference)
	Discovery GWAS	HbA1c	Fasting glucose	Discovery GWAS	HbA1c	Fasting glucose	Discovery GWAS	HbA1c	Fasting glucose	Discovery GWAS	HbA1c	Fasting glucose	Discovery GWAS	HbA1c	Fasting glucose	Discovery GWAS	HbA1c	Fasting glucose	Discovery GWAS	HbA1c	Fasting glucose
N	SNP	Proxy	Proxy	SNP	Proxy	Proxy	SNP	Proxy	Proxy	SNP	Proxy	Proxy	SNP	Proxy	Proxy	SNP	Proxy	Proxy	SNP	Proxy	Proxy
1	rs72899452	rs11038442	rs11038442	rs7556815	rs1823125	rs1823125	rs2863957	rs1823125	rs1823125	rs6737318	rs1823125	rs1823125	rs57746981	rs10800796	rs10800796	rs385199	rs440778	rs440778	rs61773390	rs17374439	rs17374439
2	rs55972276	rs13174833	rs13174833	rs915416	rs10799033	rs10799033	rs2820313	rs2820315	rs2820315	rs7534398	rs2032563	rs2032563	rs4665972	rs1260326	rs1260326	rs2431108	rs161645	rs161645	rs10917513	rs10917517	rs10917517
3	rs11650304	rs17617360	rs17617360	rs8050478	rs1510188	rs1510188	rs5757675	rs5750830	rs5750830				rs7598712	rs12986899	rs12986899	rs13284688	rs11138079	rs11138079	rs11588913	rs1389944	rs1389944
4	rs62158170	rs1823125	rs1823125	rs56372231	rs11242483	rs11242483	rs12567114	rs7549825	rs7549825				rs11123962	rs11900028	rs4851655	rs1592544	rs1592543	rs1592543	rs72720396	rs10922910	rs10922910
5	rs62264767	rs6795060	rs6795060	rs13088093	rs9826146	rs9826146	rs11763750	rs3823624	rs3823624				rs9712275	rs10497813	rs10497813	rs10149986	rs12147887	rs12147887	rs9436119	rs7513205	rs7513205
6	rs28611339	rs7014570	rs7014570	rs34556183	rs7767008	rs7767008	rs60882754	rs17285320	rs17285320				rs7607363	rs7355673	rs7355673	rs1601440	rs6782828	rs6782828	rs975025	rs12073970	rs12073970
7	rs2815757	rs1460940	rs1460940	rs34731055	rs3823624	rs3823624	rs59779556	rs9888854	rs9888854				rs13097760	rs2029920	rs2029920	rs60222088	rs12578878	rs12578878	rs72796401	rs12623521	rs12623521
8	rs2792990	rs733329	rs733329	rs73219758	rs17301963	rs17301963							rs34478464	rs9844605	rs9844605	rs80163246	rs728700	rs728700	rs6718511	rs6712981	rs6712981
9	rs670501	rs1513917	rs1513917	rs4592416	rs4755740	rs4755740							rs843372	rs865809	rs865809	rs224111	rs224082	rs224082	rs7602499	rs4952440	rs4952440
10	rs62429521	rs17069706	rs17069706	rs365663	rs458334	rs458334							rs6897863	rs7714485	rs7714485	rs10835420	rs11822774	rs11822774	rs4672458	rs6743637	rs6743637
11	rs35322724	rs8056764	rs8056764	rs11885663	rs13004083	rs13004083							rs12153518	rs11745848	rs11745848	rs2370926	rs2134366	rs2134366	rs359248	rs243280	rs243280
12	rs3902952	rs12595958	rs12595958	rs269054	rs3850552	rs3850552							rs3122170	rs3134704	rs3134704	rs1931175	rs12116443	rs12116443	rs12464387	rs2287231	rs2287231
13	rs830716	rs830733	rs830733	rs2192528	rs2160106	rs2160106							rs1566362	rs12553882	rs12553882	rs10257273	rs10254729	rs10254729	rs6727752	rs12473951	rs12473951
14	rs67501351	rs2521480	rs2521480	rs12246842	rs1243186	rs1243186							rs8015449	rs6574676	rs6574676	rs2417268	rs10734862	rs10734862	rs77248969	rs12468768	rs12468768
15	rs34214423	rs12325489	rs12325489	rs12567114	rs7549825	rs7549825							rs11078398	rs11868035	rs11868035	rs971415	rs1110960	rs1110960	rs28380327	rs13413953	rs13413953
16	rs116466468	rs11686762	rs11686762	rs1776776	rs11137148	rs11137148										rs301817	rs301816	rs301816	rs2166559	rs2121432	rs2121432
17	rs2903385	rs10010325	rs10010325	rs10421649	rs2287838	rs2287838										rs11967137	rs9393909	rs9393909	rs4666682	rs16826685	rs16826685
18	rs10800992	rs12402747	rs12402747	rs113113059	rs2273709	rs2273709										rs1518394	rs12713370	rs12713370	rs111261826	rs6796207	rs6796207
19	rs55772859	rs6732156	rs6732156	rs7503199	rs12603646	rs12603646										rs528301822	rs3785074	rs3785074	rs9817910	rs958542	rs958542
20	rs35539975	rs7708353	rs7446138	rs7806045	rs6962471	rs6962471										rs62189006	rs1006427	rs1006427	rs73050286	rs6550742	rs6550742
21	rs12666306	rs1358393	rs1358393	rs35531607	rs13149286	rs13149286										rs3986805	rs4788084	rs4788084	rs12636669	rs11130230	rs11130230
22	rs56133505	rs12146545	rs12146545	rs9345234	rs6909485	rs6909485										rs11224896	rs11224897	rs11224897	rs7626335	rs6779041	rs6779041
23	rs6808140	rs4383496	rs4383496	rs55658675	rs8181939	rs8181939										rs7422655	rs11694118	rs11694118	rs12631477	rs6768298	rs6768298
24	rs35110063	rs9311332	rs9311332	rs11567976	rs7443648	rs7443648										rs4357022	rs4395620	rs4395620	rs34967119	rs2047806	rs2047806
25	rs324017	rs324015	rs324015	rs180769	rs180767	rs180767										rs13263535	rs11777587	rs11777587	rs72950188	rs10511356	rs10511356
26	rs6562066	rs9538537	rs9538537	rs1553132	rs10501670	rs10501670										rs112520848	rs4577128	rs4577128	rs1468945	rs1541612	rs1541612
27	rs12924275	rs4985101	rs4985101	rs9903973	rs1492233	rs1492233										rs936944	rs10865934	rs10865934	rs4690085	rs3733215	rs3733215
28	rs62213452	rs1396777	rs1396777	rs11614986	rs4499061	rs4499061										rs34728579	rs4799739	rs4799739	rs4698678	rs4259061	rs4259061
29	rs72773790	rs12684650	rs12684650	rs2231265	rs7745708	rs7745708										rs4356873	rs7688754	rs7688754	rs1502249	rs1378788	rs1378788
30	rs1530938	rs2317299	rs2317299	rs174560	rs174574	rs174574										rs9883093	NA	rs9863319	rs6846730	rs3828538	rs3828538
31	rs2737240	rs2737245	rs2737245	rs10173260	rs7562585	rs7562585													rs9991917	rs1511505	rs1511505
32	rs2221119	rs604179	rs604179	rs10761674	rs10761676	rs10761676													rs4241964	rs1296328	rs1296328
33	rs34967082	rs4673853	rs4673853	rs11190970	rs11191015	rs11191015													rs72729847	rs6841790	rs6841790
34	rs6601080	rs1540526	rs1540526																rs9997394	rs2125259	rs2125259
35	rs2598293	rs432487	rs432487																rs10058356	rs10064495	rs10064495
36	rs871994	rs951515	rs951515																rs7721608	rs9686502	NA
37	rs12605642	rs9959347	rs9959347																rs66507804	rs7702514	rs7702514
38	rs72820274	rs6707445	rs6707445																rs77960	rs161645	rs161645
39	rs10928256	rs7592820	rs7592820																rs67988891	rs4246036	rs4246036
40	rs874168	rs17648656	rs17648656																rs7735794	rs11134949	rs11134949
41	rs1580173	rs7636464	rs7636464																rs9465253	rs2205743	rs2205743
42	rs10955647	rs12675949	rs12675949																rs13203140	rs12195277	rs12195277
43	rs10825503	rs12411627	rs12411627																rs12195792	rs9375321	rs9375321
44	rs10947987	rs6902650	rs6902650																rs9496623	rs9321909	rs9321909
45	rs4858708	rs1039293	rs1039293																rs9347926	rs12528334	rs12528334
46	rs190073	rs218968	rs218968																rs10237162	rs272695	rs272695
47	rs11588755	rs11590708	rs11590708																rs10951325	rs10237329	rs10237329
48	rs4788203	rs11150577	rs11150577																rs2944831	rs2138759	rs2138759
49	rs34036083	rs10865356	rs10865356																rs10254050	rs1403179	rs1403179
50	rs6702604	rs10785799	rs10494048																rs17302081	rs1113295	rs1113295
51	rs73163783	rs6791692	rs6791692																rs62465218	rs11766036	rs11766036
52	rs10944696	rs1537834	rs1537834																rs6958557	rs12707128	rs12707128
53	rs671985	rs1214478	rs1214478																rs35524253	rs4875422	rs4875422
54	rs11001276	rs755228	rs755228																rs2979139	rs2976945	rs2976945
55	rs3184470	rs3743909	rs3743909																rs6993892	rs6468202	rs6468202
56	rs8076183	rs4968746	rs11079495																rs6468316	rs1528710	rs1528710
57	rs7571486	rs6729029	rs6729029																rs34054660	rs1867492	rs1867492
58	rs12251016	rs10828247	rs10828247																rs187028	rs6472696	rs6472696
59	rs7615602	rs9845140	rs9845140																rs6988733	rs2105965	rs2105965
60	rs521484	rs495813	rs495813																rs3100052	rs2386922	rs2386922
61	rs75932578	rs2107318	rs2107318																rs2844016	rs2844019	rs2844019
62	rs11803128	rs2000234	rs2000234																rs12378543	rs10780435	rs10780435
63	rs7044885	rs11138085	rs11138085																rs295268	rs12682981	rs12682981
64	rs62301574	rs4501212	rs4501212																rs12380242	rs3812584	rs3812584
65	rs314281	rs314280	rs314280																rs9416744	rs4948547	rs4948547
66	rs60565673	rs1261073	rs1261073																rs61875203	rs6583802	rs6583802
67	rs694786	rs583514	rs583514																rs11200159	rs4752595	rs4752595
68	rs7214267	rs6503422	rs6503422																rs3808964	rs4282930	rs4282930
69	rs11605348	rs12419692	rs12419692																rs76518095	rs7086182	rs7086182
70	rs8180817	rs2894699	rs2894699																rs12771973	rs7085239	rs7085239
71	rs2431108	rs161645	rs161645																rs10832648	rs7115099	rs7115099
72	rs66674044	rs8055543	rs12444979																rs7111582	rs2434475	rs2434475
73	rs492858	rs358749	rs358749																rs12808544	rs2275993	rs2275993
74	rs6597649	NA	rs6597650																rs2514214	rs2511515	rs2511515
75	rs6967168	NA	rs6956407																rs74357745	rs11218901	rs11218901
76																			rs1799464	rs1799458	rs1799458
77																			rs11611435	rs16926892	rs16926892
78																			rs13377754	rs3912355	rs3912355
79																			rs4761989	rs1905242	rs1905242
80																			rs487722	rs2943693	rs2943693
81																			rs7959983	rs7488228	rs7488228
82																			rs7298532	rs2339973	rs2339973
83																			rs9597241	rs9591675	rs9591675
84																			rs12871550	rs9317039	rs9317039
85																			rs9571526	rs9571528	rs9571528
86																			rs9573980	rs7989931	rs7989931
87																			rs1886205	rs12855239	rs12855239
88																			rs61990287	rs12879030	rs12879030
89																			rs6573308	rs2093210	rs2093210
90																			rs4550384	rs17120405	rs17120405
91																			rs72773411	rs6597	rs6597
92																			rs11641239	rs8063962	rs8063962
93																			rs7203707	rs7196720	rs7196720
94																			rs4785296	rs17788691	rs17788691
95																			rs12950382	rs9908969	rs9908969
96																			rs2011528	rs7208672	rs7208672
97																			rs55846845	rs8069722	rs8069722
98																			rs58681483	rs34687426	rs8067568
99																			rs4800998	rs4800933	rs4800933
100																			rs10402849	rs10412559	rs10412559
101																			rs7248205	rs892085	rs892085
102																			rs58876439	rs10421547	rs10421547
103																			rs1737893	rs1742983	rs1742983
104																			rs695459	rs9613630	rs9613630
105																			rs139911	rs139914	rs139914
106																			rs10916892	NA	rs4654726
107																			rs812925	NA	rs11125883
108																			rs1398346	NA	rs1512516
109																			rs2433634	NA	rs2467110
Outcome GWAS of HbA1c was obtained from Soranzo N et al 2010, PMC: 2992787; outcome GWAS of fasting glucose was obtained from Dupuis J et al 2010, PMC: 3018764.

## Sheet: ST10
Supplementary Table 10: The overlapped SNPs across the self-reported sleep traits
SNP	Gene	Effect Allele	Other Allele	Sleep traits
				Insomnia symptoms			24-hour sleep duration			Short sleep duration			Long sleep duration			Daytime sleepiness			Daytime napping
				logodds	SE	p-value	Beta	SE	p-value	logodds	SE	p-value	logodds	SE	p-value	Beta	SE	p-value	Beta	SE	p-value
rs17005118	RASGEF1B, PRKG2	A	G	0.0421012	0.007	6.13e-10	-	-	-	0.03	0.00648045	2.5e-09	-	-	-	-	-	-	-	-	-
rs13135092	SLC39A8	A	G	-0.0888312	0.011	2.53e-16	-	-	-	-	-	-	-	-	-	0.92	-0.0103303	0.0018774	-	-	-
rs2431108	RP11-6N13.1	T	C	-0.0534008	0.006	7.83e-17	-	-	-	-	-	-	-	-	-	-	-	-	-0.0146	0.0009	9.95e-58
rs910187	ZMYND8	A	G	-0.0345914	0.006	1.63e-08	-	-	-	-	-	-	-	-	-	-	-	-	-0.0058	0.0009	2.56e-10
rs12567114	DPYD	A	G	-	-	-	0.89	0.152	4.3e-09	-0.036	0.00643643	4.1e-09	-	-	-	-	-	-	-	-	-
rs205024	SHISA6	T	C	-	-	-	0.83	0.14	3.9e-09	-0.031	0.00647413	2.7e-08	-	-	-	-	-	-	-	-	-
rs75539574	VRK2, LINC01122	C	A	-	-	-	2.175	0.244	6.9e-19	-0.045	0.0108453	8.4e-11	-	-	-	-	-	-	-	-	-
rs12140153	PATJ	G	T	-	-	-	-	-	-	-	-	-	-	-	-	0.01658	0.00179639	2.8e-20	0.0211	0.0016	6.97e-41
